# Supplementary material for: Host genetic selection for cold tolerance shapes microbiome composition and modulates its response to temperature
Source: eLife journal article supplement (doi:10.7554/elife.36398), 2018-11-19
Supplement: supp [file elife-36398-supp-v1.zip]

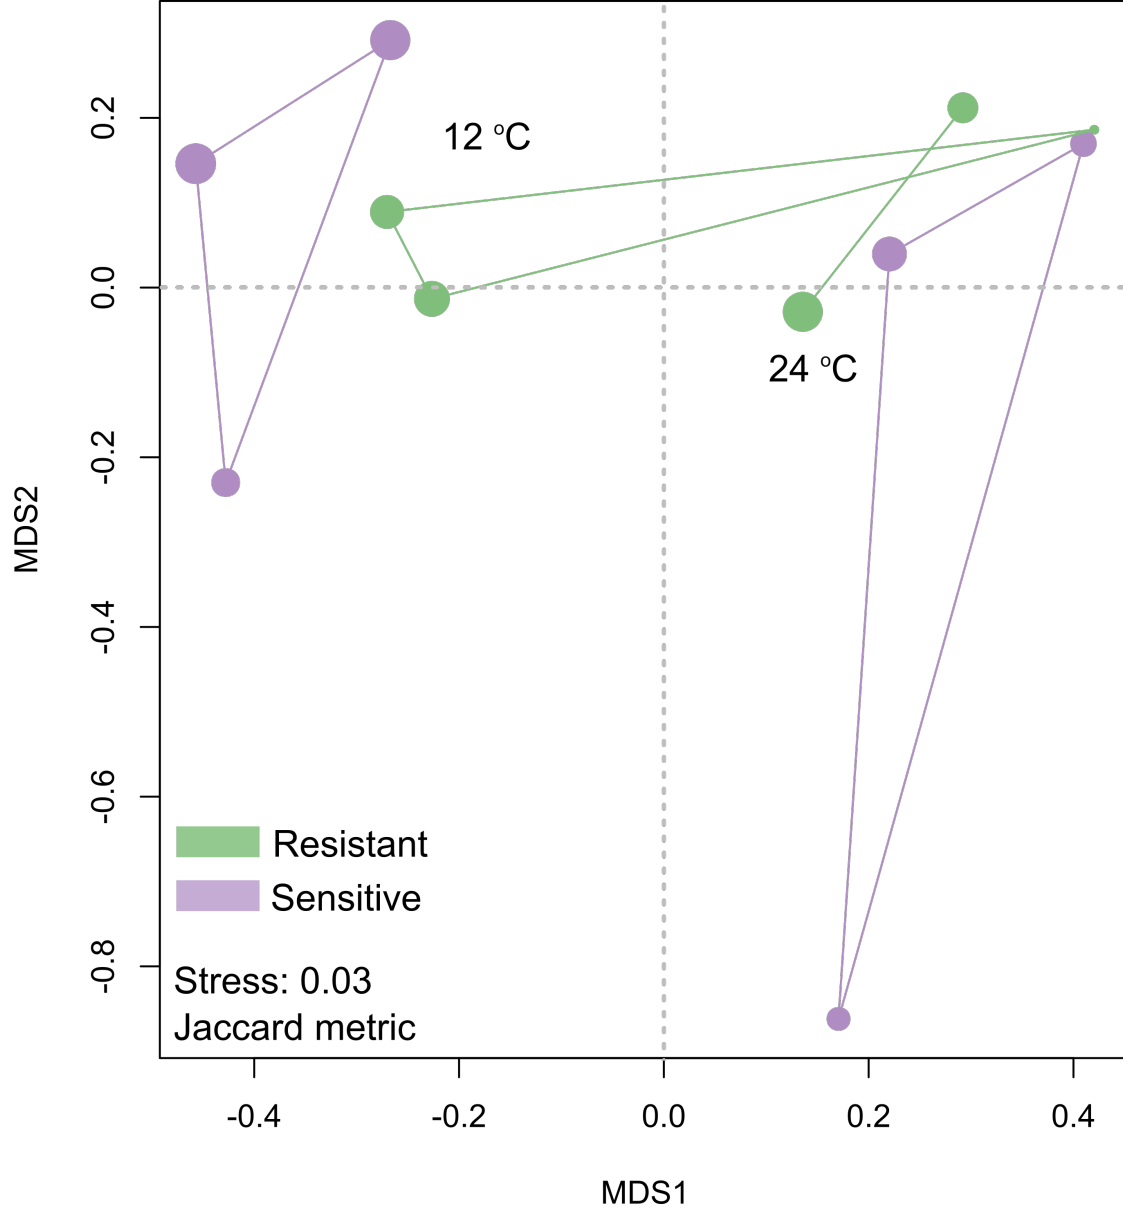

**Figure 4 – figure supplement 1.** Non-metric Multidimensional scaling (NMDS) on the liver transcriptome data showed that clusters were formed based on the Jaccard metric, between the resistant and sensitive fish lines at 12°C and 24°C. Size of the dot is relative to the goodness of fit for the first principal coordinate times 100 using the Jaccard metric.
