# Supplementary material for: Host genetic selection for cold tolerance shapes microbiome composition and modulates its response to temperature
Source: eLife journal article supplement (doi:10.7554/elife.36398), 2018-11-19
Supplement: supp [file elife-36398-supp-v1.zip]

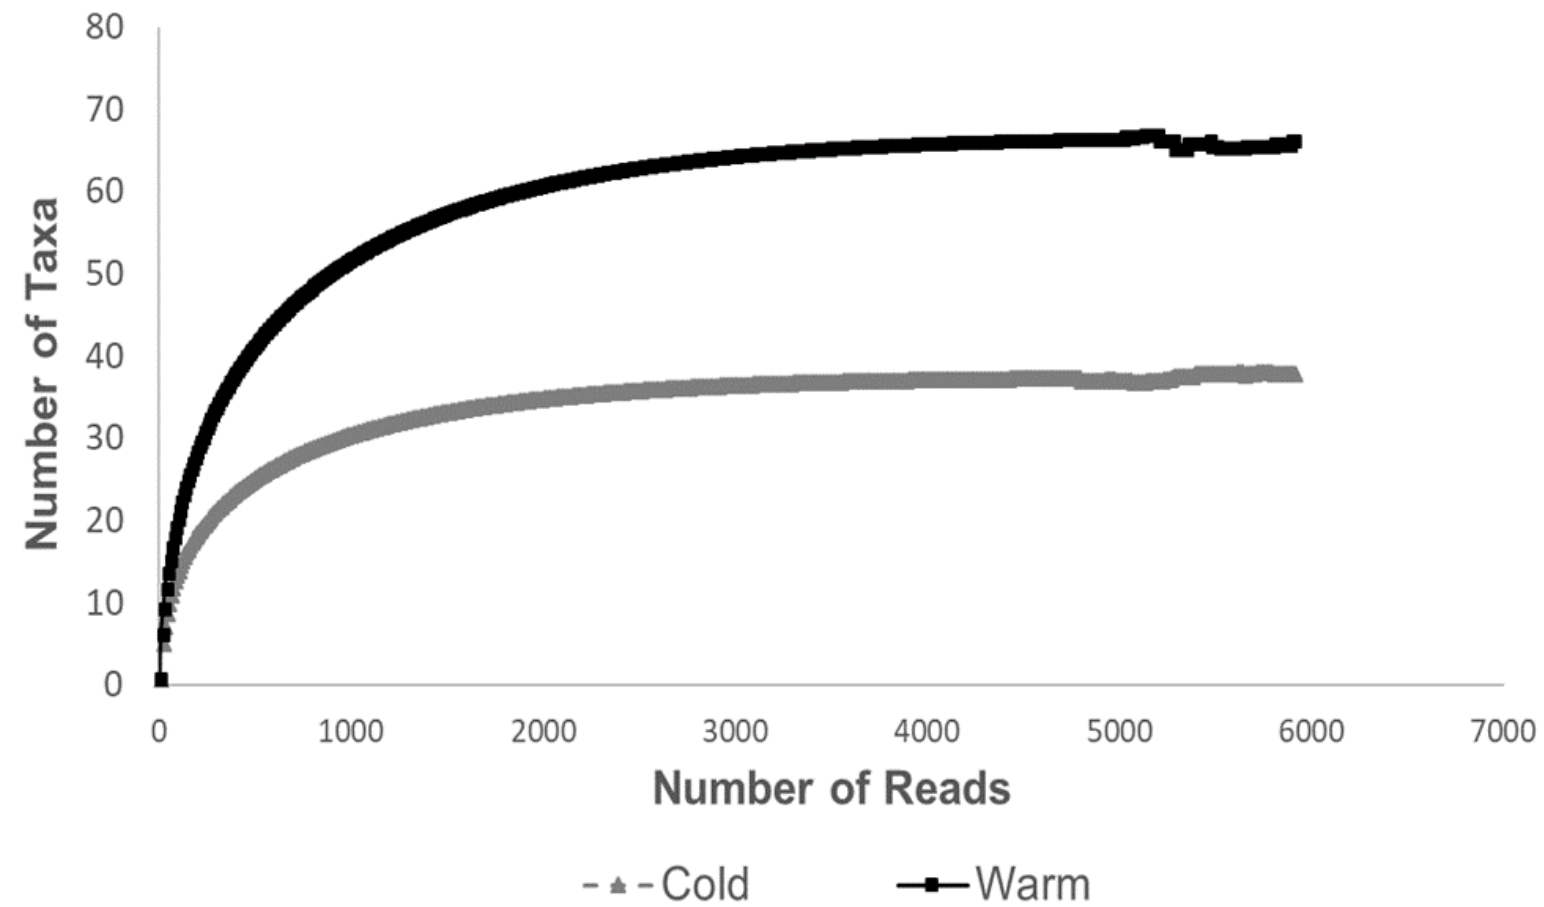

**Figure 2 – figure supplement 2.** Rarefaction curves per sequence depth in the different temperatures. The results show that there is higher number of taxa per sequence depth in the 24°C.
