# Supplementary material for: Host genetic selection for cold tolerance shapes microbiome composition and modulates its response to temperature
Source: eLife journal article supplement (doi:10.7554/elife.36398), 2018-11-19
Supplement: supp [file elife-36398-supp-v1.zip]

Archive with 15 entries (15 files):
- elife_poa_e36398_Figure_2_figure_supplement_3.pdf
- elife_poa_e36398_Figure_4_figure_supplement_3.pdf
- elife_poa_e36398_Figure_2_figure_supplement_1.pdf
- elife_poa_e36398_Figure_2_figure_supplement_6.pdf
- elife_poa_e36398_Figure_1_figure_supplement_1.pdf
- elife_poa_e36398_Figure_2_figure_supplement_2.pdf
- elife_poa_e36398_Figure_4_figure_supplement_2.pdf
- elife_poa_e36398_Figure_2_figure_supplement_4.pdf
- elife_poa_e36398_Transparent_Reporting_File.docx
- elife_poa_e36398_Figure_3_figure_supplement_1.pdf
- elife_poa_e36398_Figure_2_figure_supplement_5.pdf
- elife_poa_e36398_Figure_2_figure_supplement_8.pdf
- elife_poa_e36398_Supplementary_File_1.docx
- elife_poa_e36398_Figure_4_figure_supplement_1.pdf
- elife_poa_e36398_Figure_2_figure_supplement_7.pdf
