# Supplementary material for: Host genetic selection for cold tolerance shapes microbiome composition and modulates its response to temperature
Source: eLife journal article supplement (doi:10.7554/elife.36398), 2018-11-19
Supplement: supp [file elife-36398-supp-v1.zip]

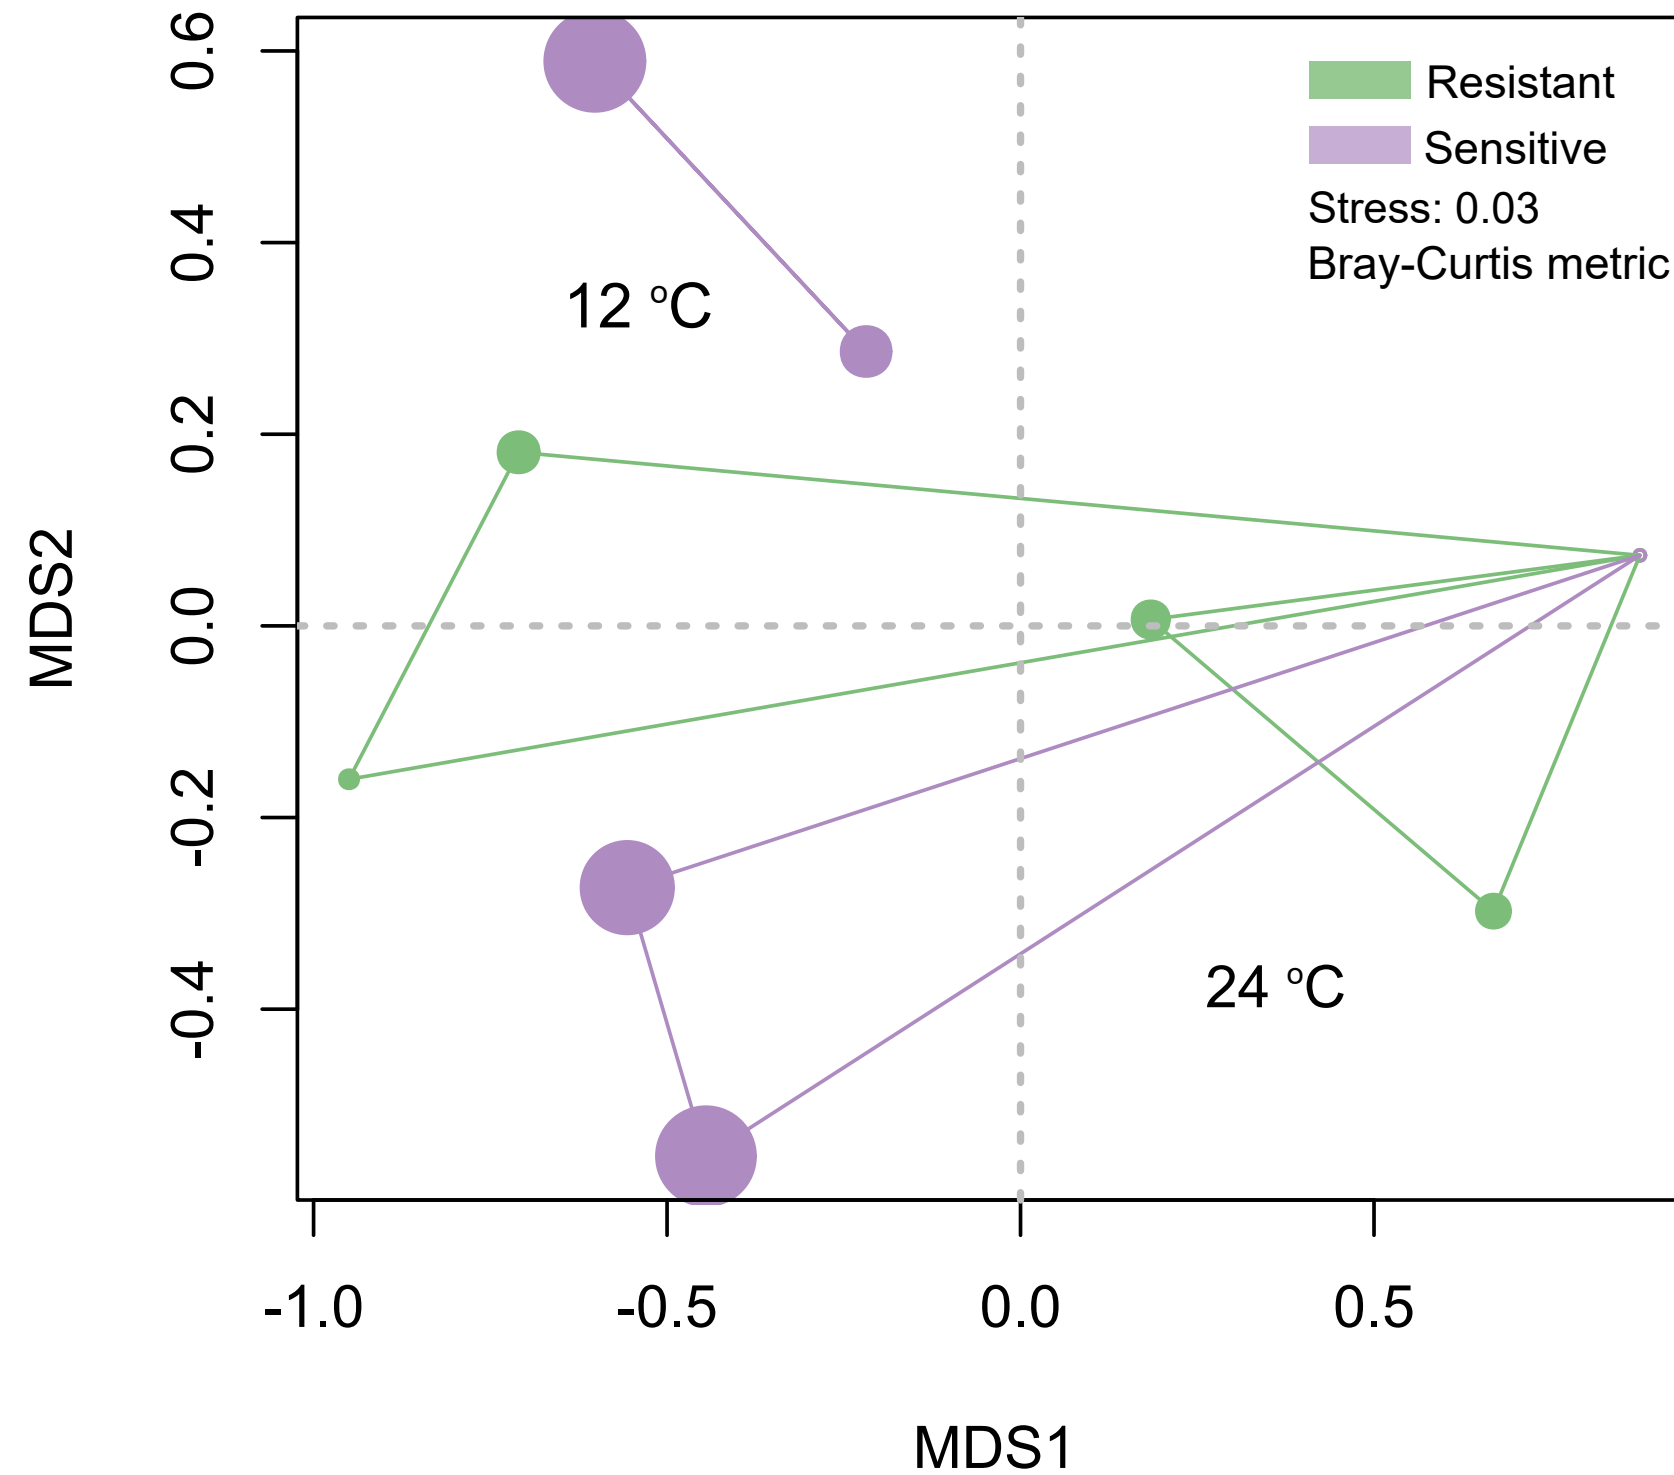

**Figure 4 – figure supplement 3.** Principal coordinate analysis using Bray-Curtis metric for the selected individuals, for which transcriptomic analysis was performed. Size of the dot is relative to the goodness of fit for the first principal coordinate times 100 using the Bray-Curtis metric.
