# Supplementary material for: Host genetic selection for cold tolerance shapes microbiome composition and modulates its response to temperature
Source: eLife journal article supplement (doi:10.7554/elife.36398), 2018-11-19
Supplement: supp [file elife-36398-supp-v1.zip › elife_poa_e36398_Figure_2_figure_supplement_1.pdf]

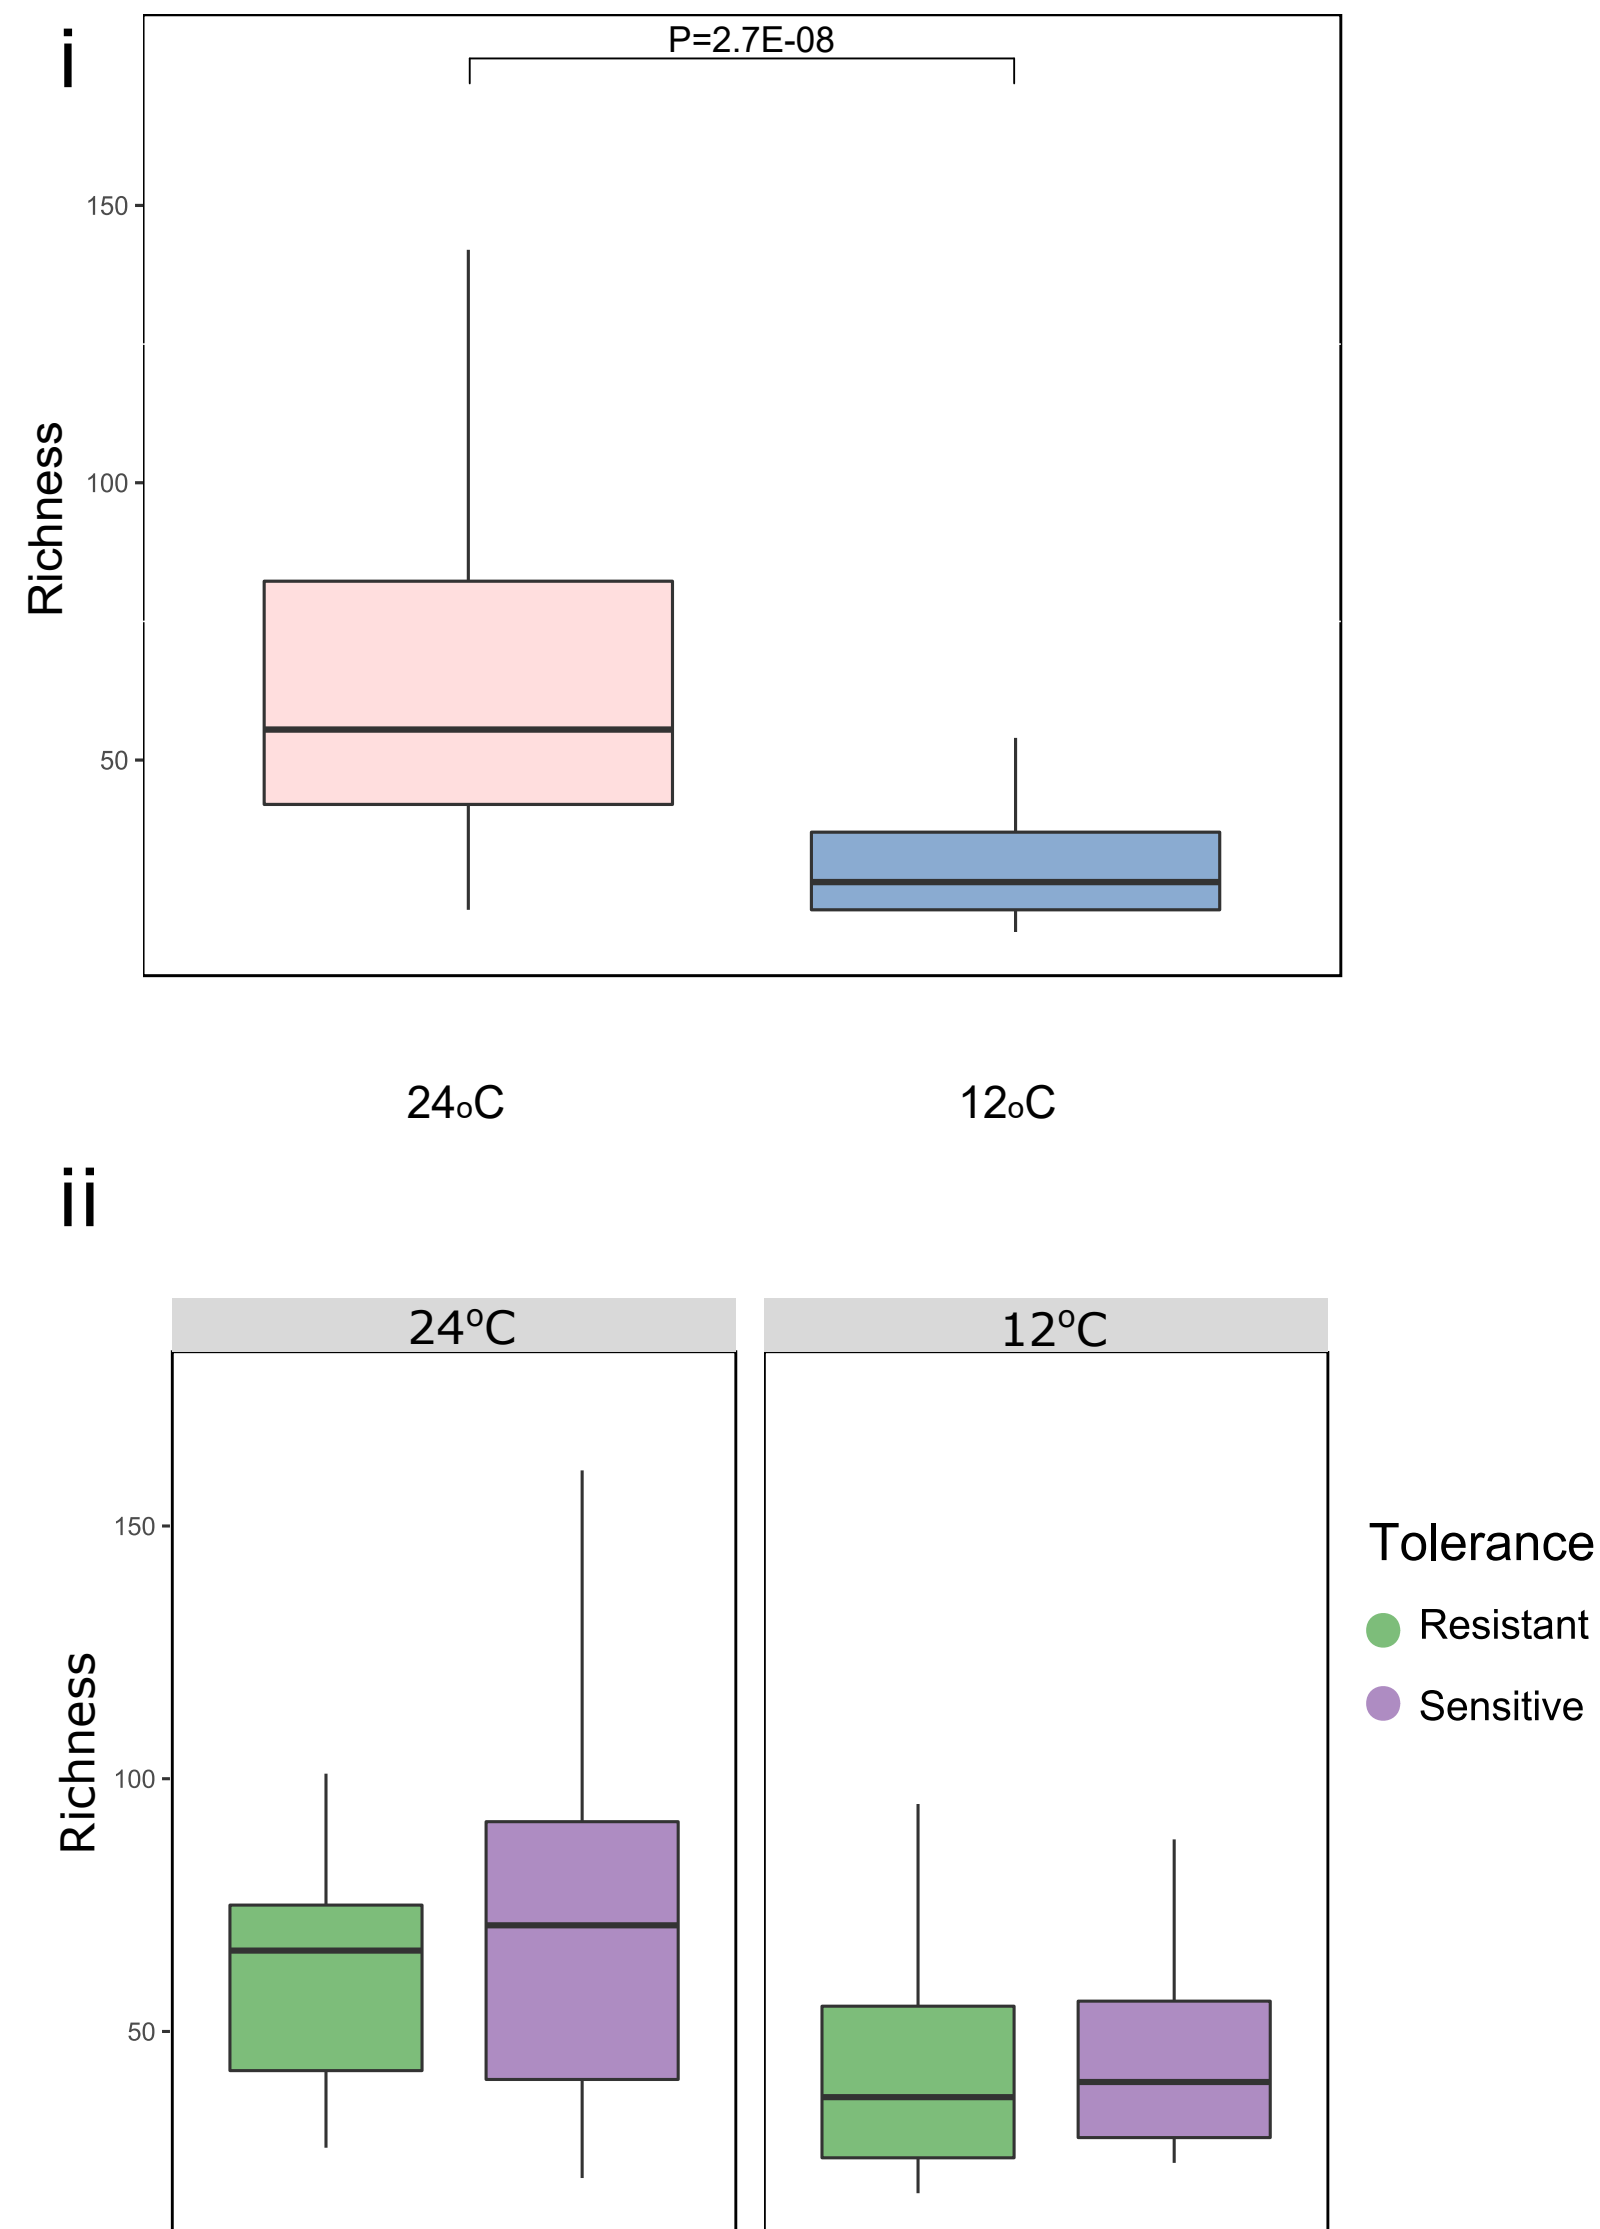

**Figure 2 – figure supplement 1.** Temperature significantly decreased (i) richness in both (ii) resistant and sensitive fish groups. P-values indicate significance after performing Wilcoxon t-test (two-sided, 95% Confidence Interval). In the box plots, horizontal line in the box represents the median and whiskers indicate the lowest and highest point within 1.5 interquartile ranges of the lower or upper quartile, respectively.
