# Supplementary material for: Host genetic selection for cold tolerance shapes microbiome composition and modulates its response to temperature
Source: eLife journal article supplement (doi:10.7554/elife.36398), 2018-11-19
Supplement: supp [file elife-36398-supp-v1.zip › elife_poa_e36398_Figure_2_figure_supplement_3.pdf]

i

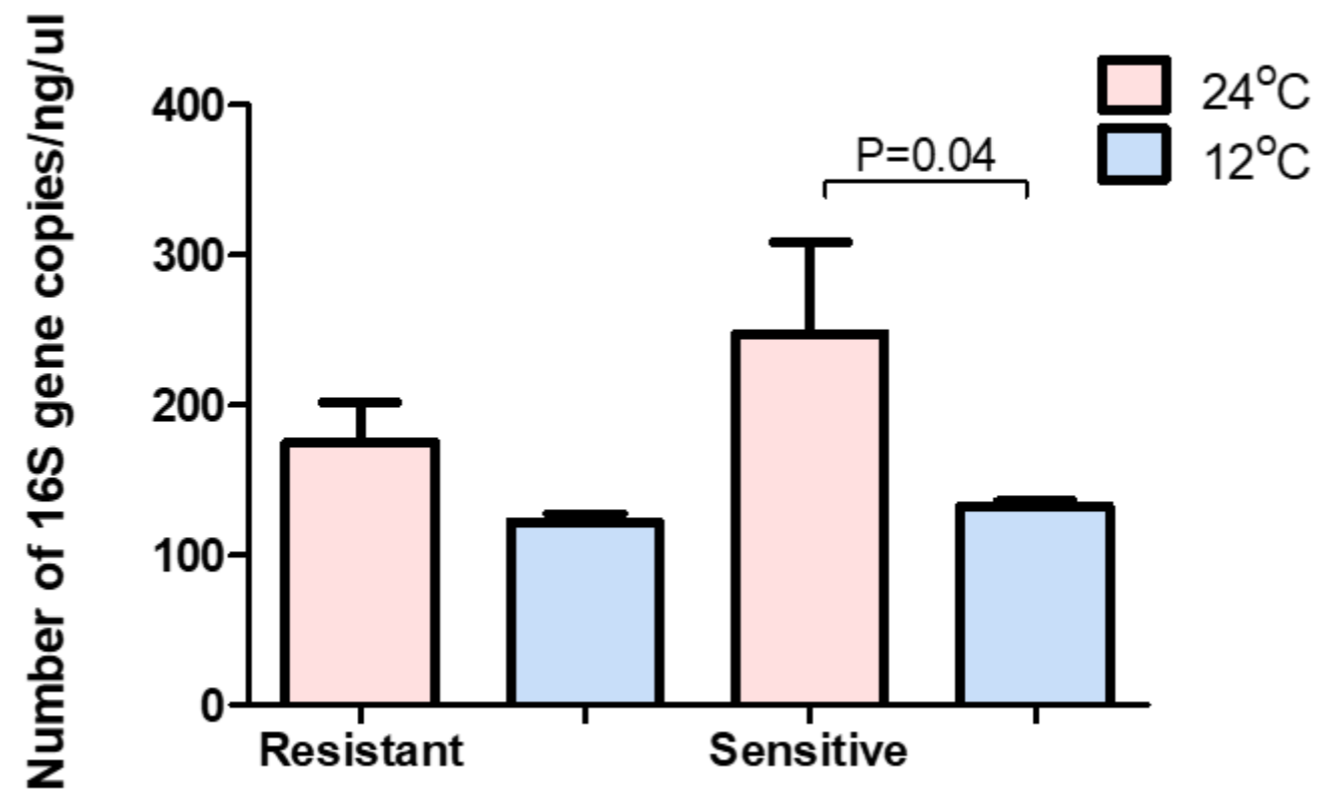

ii

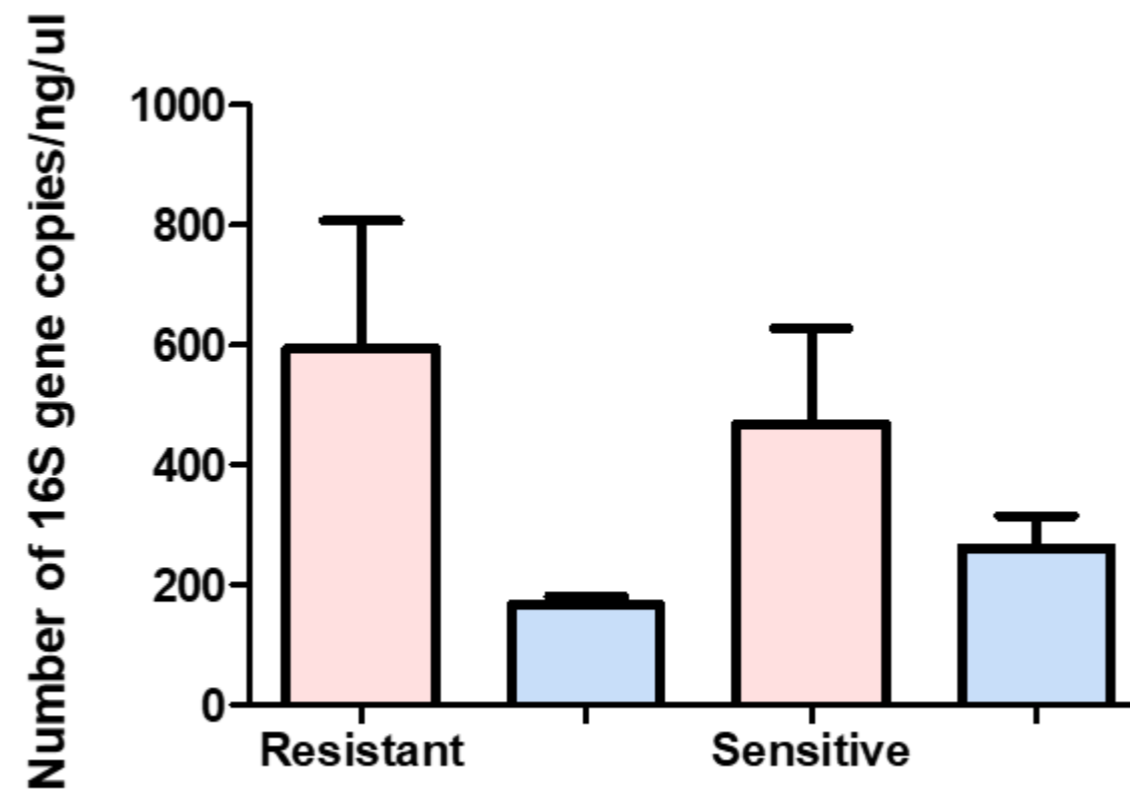

**Figure 2 – figure supplement 3.** Total bacterial 16S gene copy number within each group at 24°C (pink) and 12°C (blue) in the (i) anterior and (ii) posterior gut of resistant and sensitive fish. Bar plots show the mean copy number per group and whiskers the standard error of the mean. P-values indicate significance after performing t-test, two-sided, 95% confidence interval.
