# Supplementary material for: Host genetic selection for cold tolerance shapes microbiome composition and modulates its response to temperature
Source: eLife journal article supplement (doi:10.7554/elife.36398), 2018-11-19
Supplement: supp [file elife-36398-supp-v1.zip › elife_poa_e36398_Figure_2_figure_supplement_4.pdf]

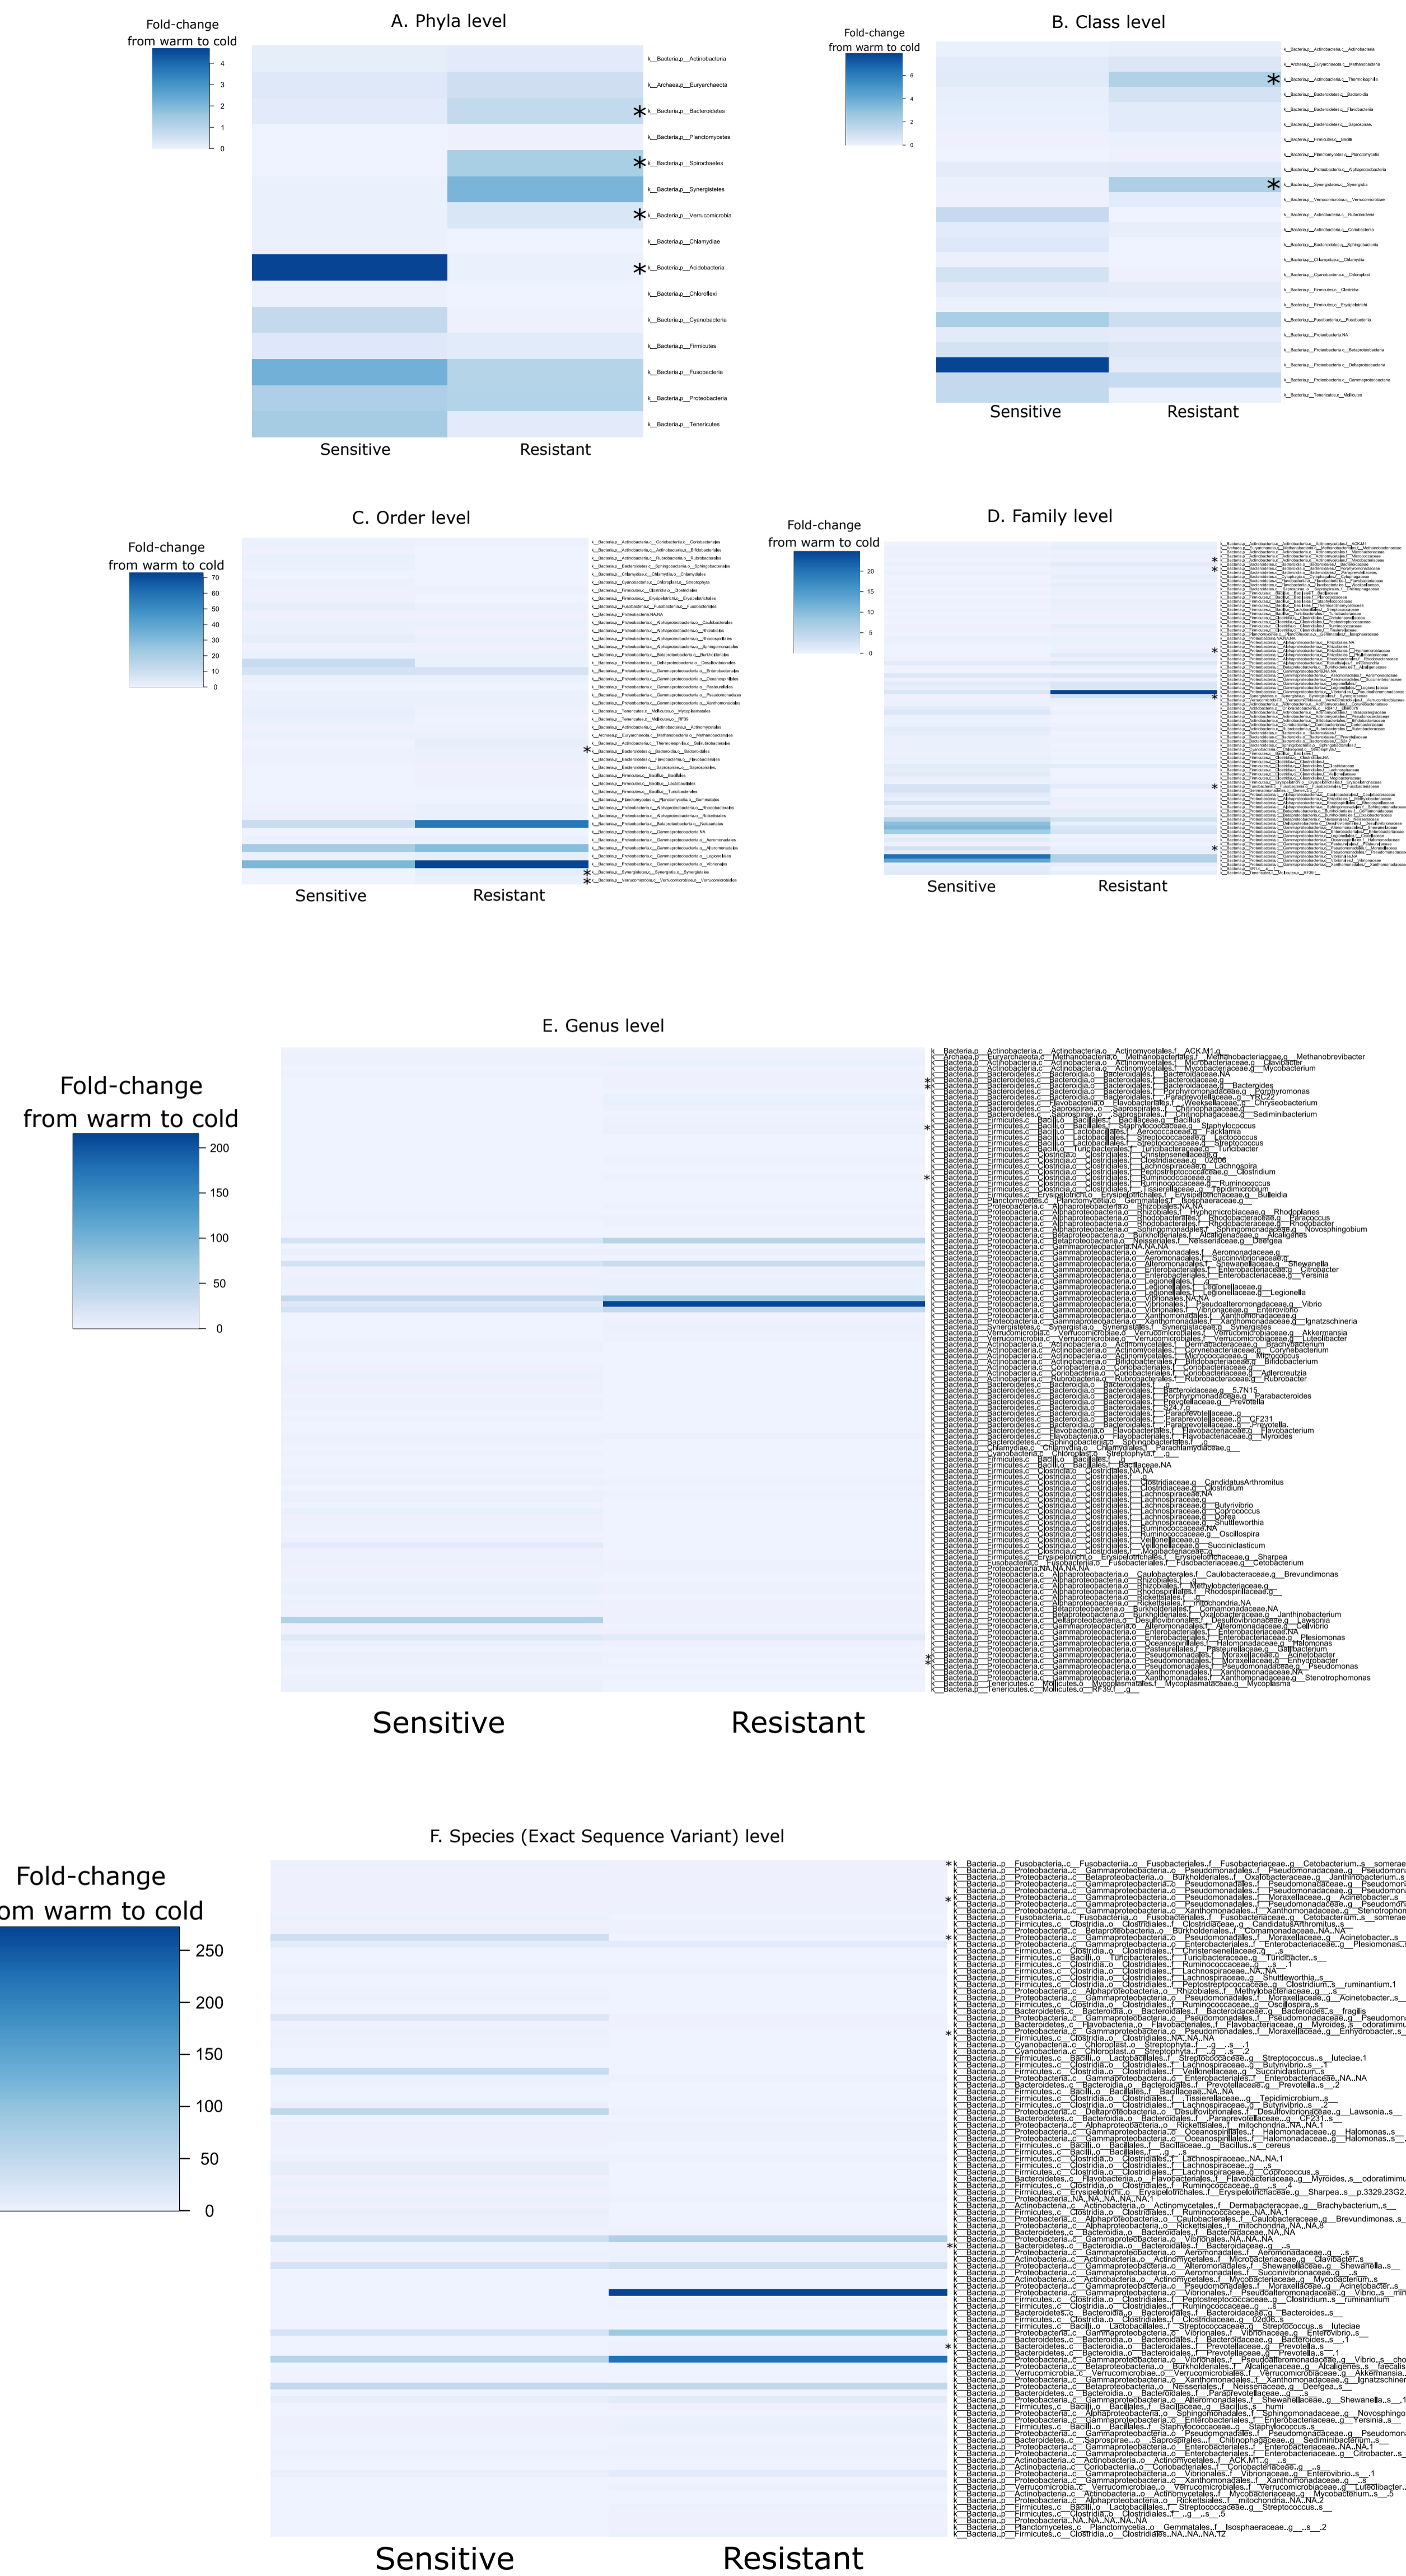

**Figure 2 – figure supplement 4.** Fold change in the taxa abundance at different taxonomic levels from 24°C to 12°C within the gut of the resistant and sensitive host groups. Values below 1 indicate decrease in the taxon abundance after cold exposure, while values above 1 show increase in the abundance.
