# Supplementary material for: Host genetic selection for cold tolerance shapes microbiome composition and modulates its response to temperature
Source: eLife journal article supplement (doi:10.7554/elife.36398), 2018-11-19
Supplement: supp [file elife-36398-supp-v1.zip › elife_poa_e36398_Figure_2_figure_supplement_5.pdf]

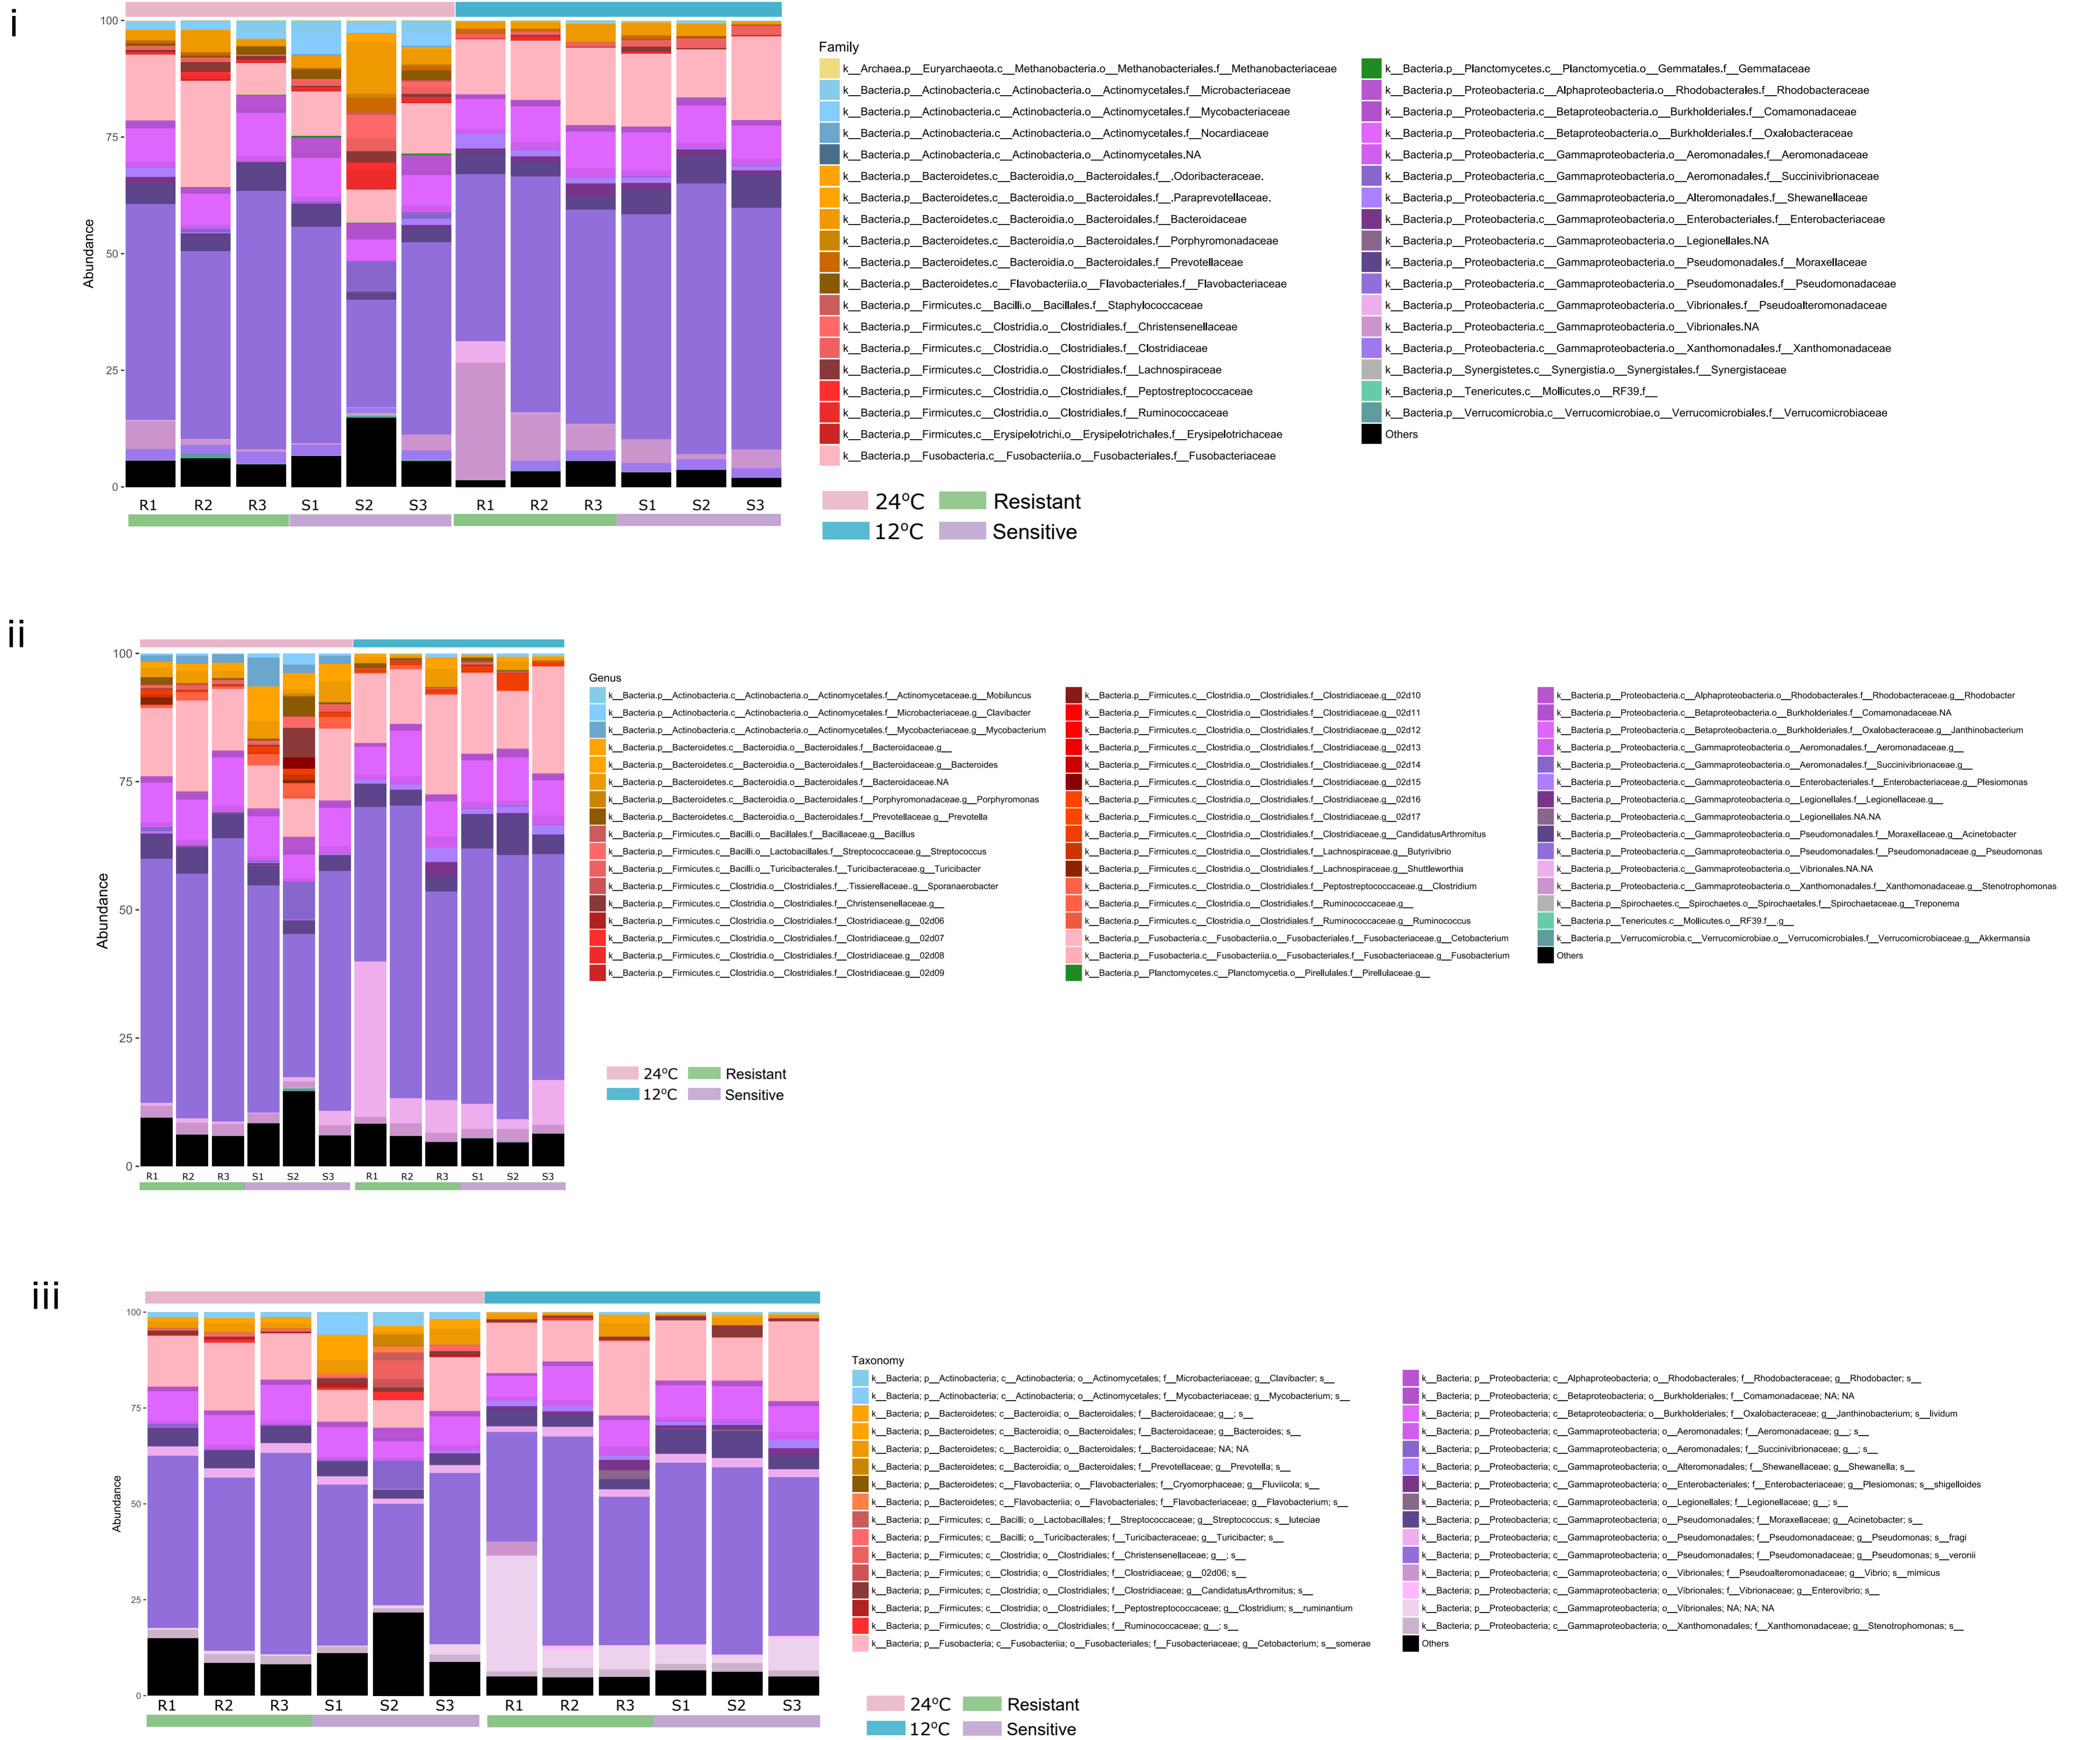

**Figure 2 – figure supplement 5.** Relative abundance of the most abundant microbial taxa within the posterior gut of the different groups in the two temperature conditions, at the (i) family, (ii) genus and (iii) exact sequence variant level (ESV).
