# Supplementary material for: Host genetic selection for cold tolerance shapes microbiome composition and modulates its response to temperature
Source: eLife journal article supplement (doi:10.7554/elife.36398), 2018-11-19
Supplement: supp [file elife-36398-supp-v1.zip › elife_poa_e36398_Figure_2_figure_supplement_6.pdf]

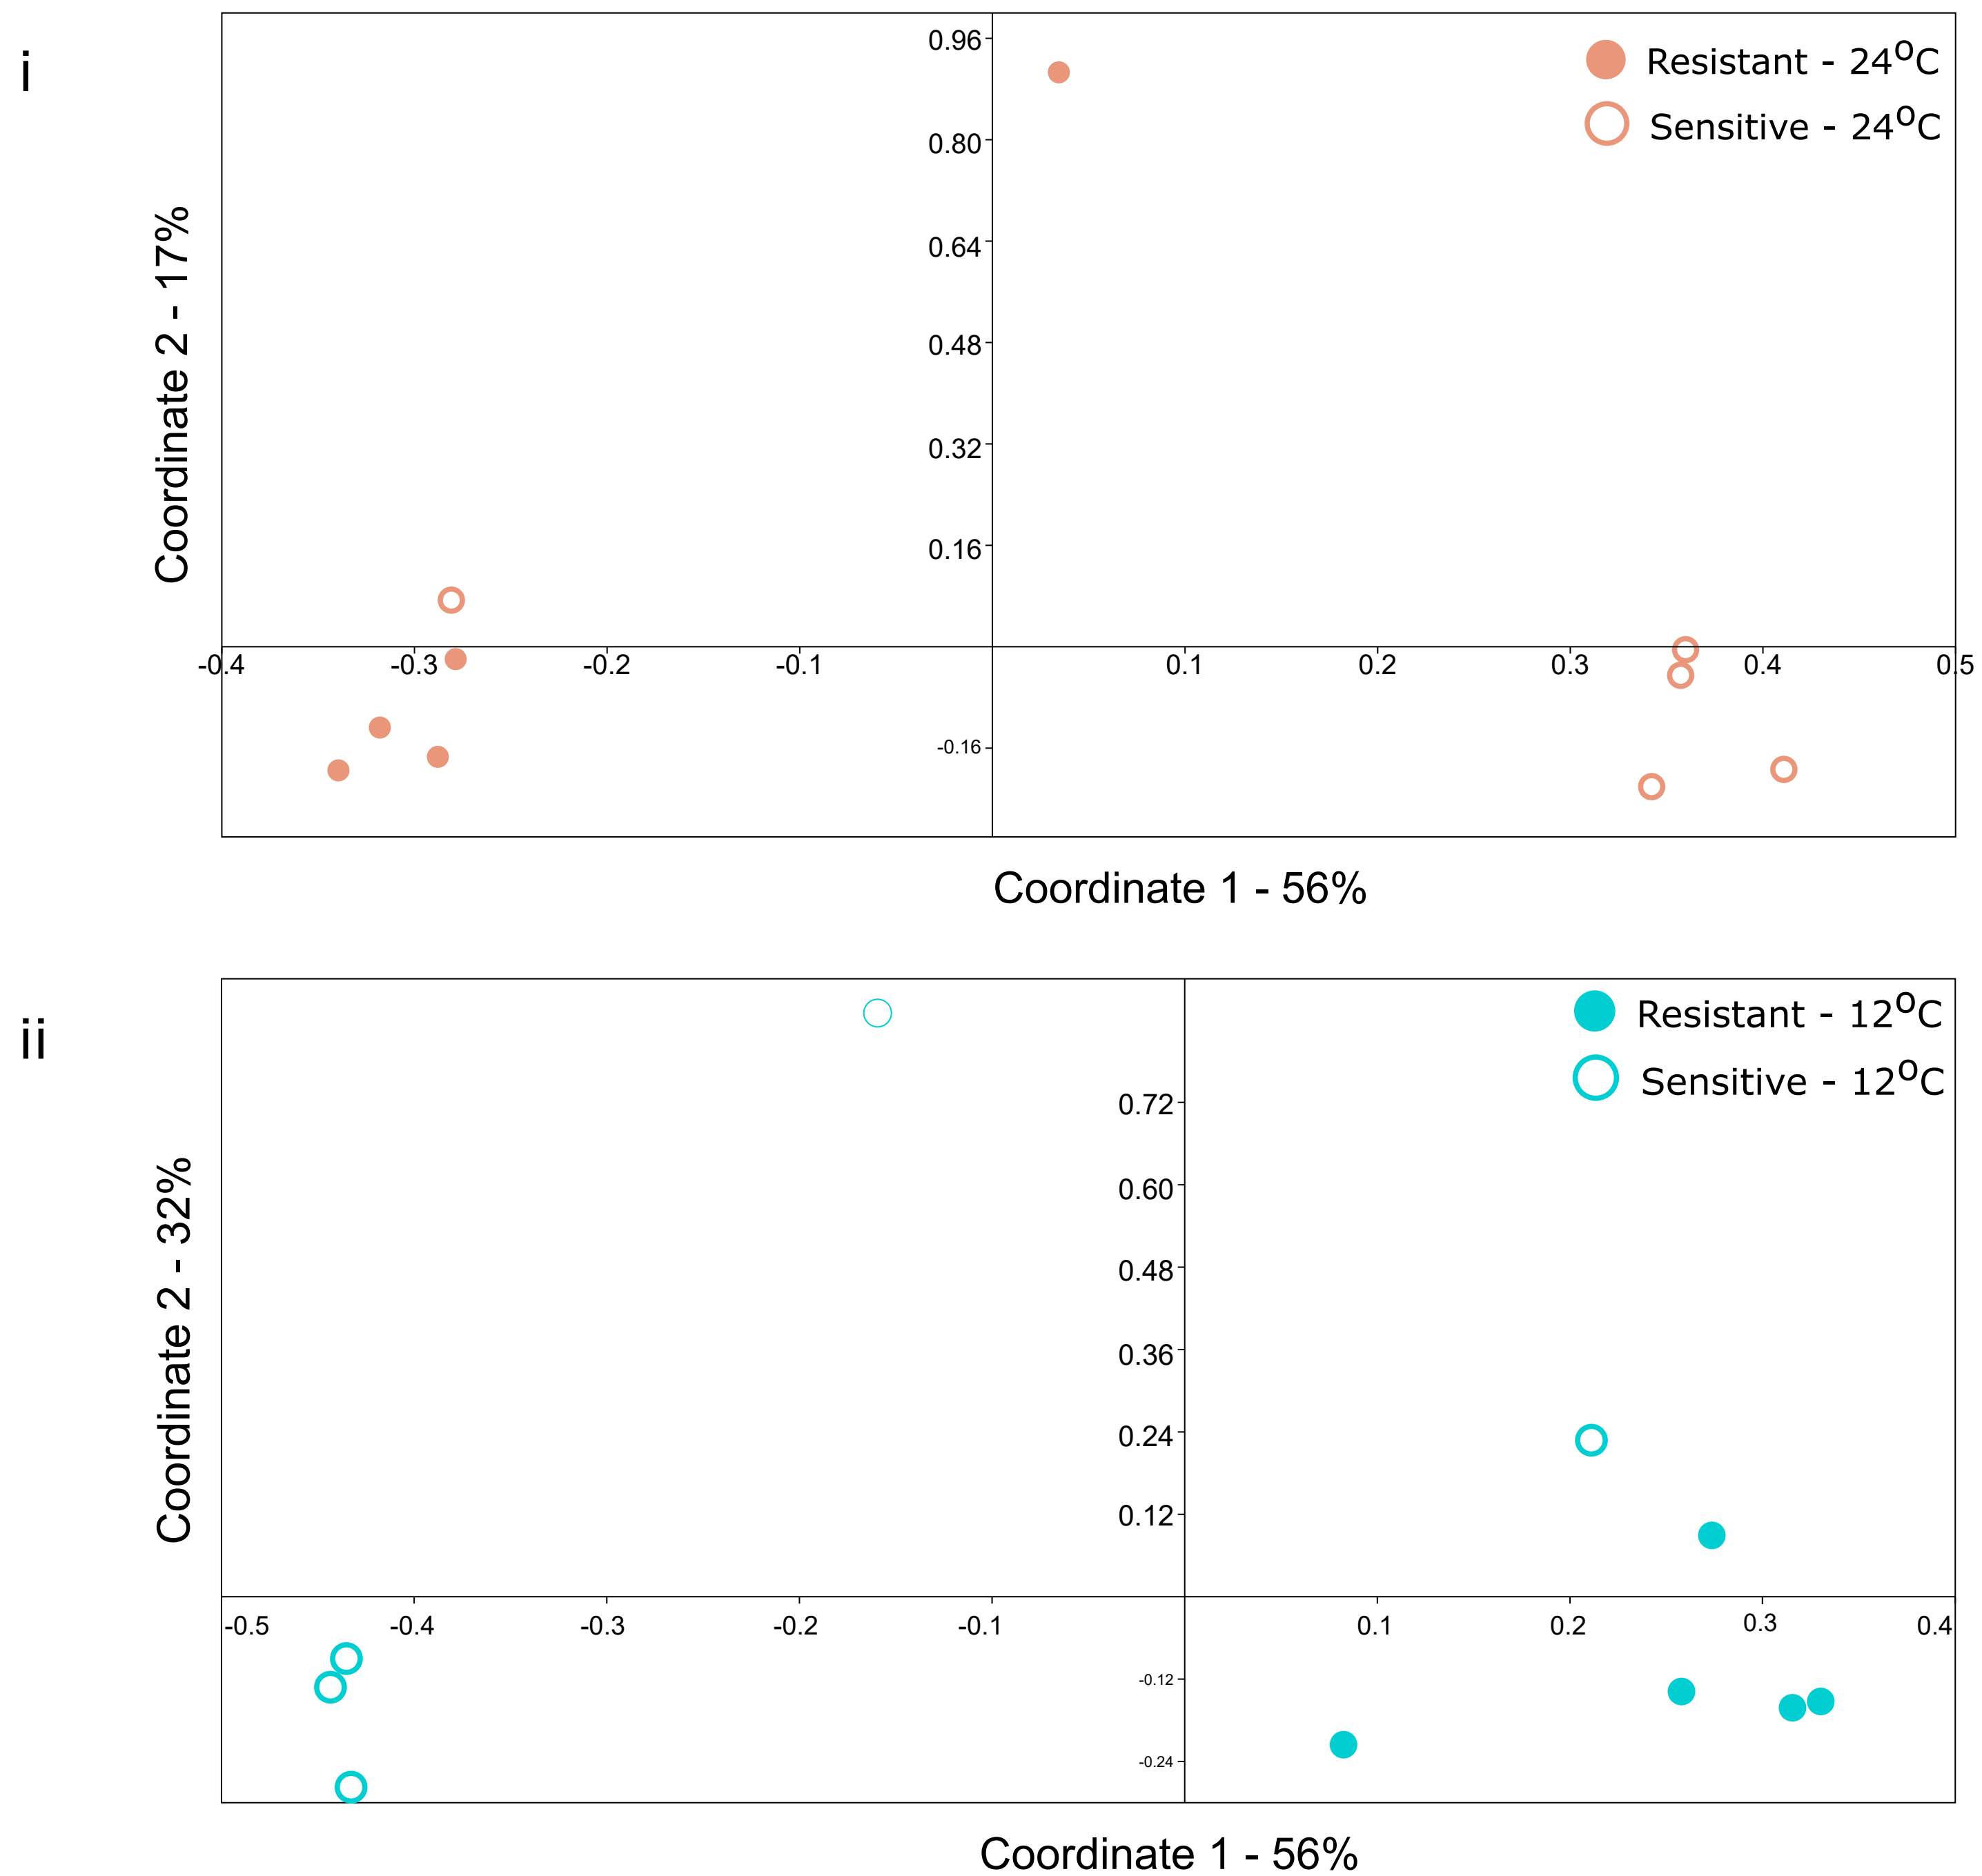

**Figure 2 – figure supplement 6.** Principal Coordinate Analysis (Bray-Curtis similarity metric) of selected individuals with (i) high or (ii) low Shannon H' diversity index (see Supplementary Table S2) in (i) warm (red) and (ii) cold (blue) conditions, respectively. Clustering according to the group (Resistant, dot; Sensitive, circle) was significant (ANOSIM, P-value=0.03 and P-value=0.017, respectively).
