# Supplementary material for: Host genetic selection for cold tolerance shapes microbiome composition and modulates its response to temperature
Source: eLife journal article supplement (doi:10.7554/elife.36398), 2018-11-19
Supplement: supp [file elife-36398-supp-v1.zip › elife_poa_e36398_Figure_2_figure_supplement_7.pdf]

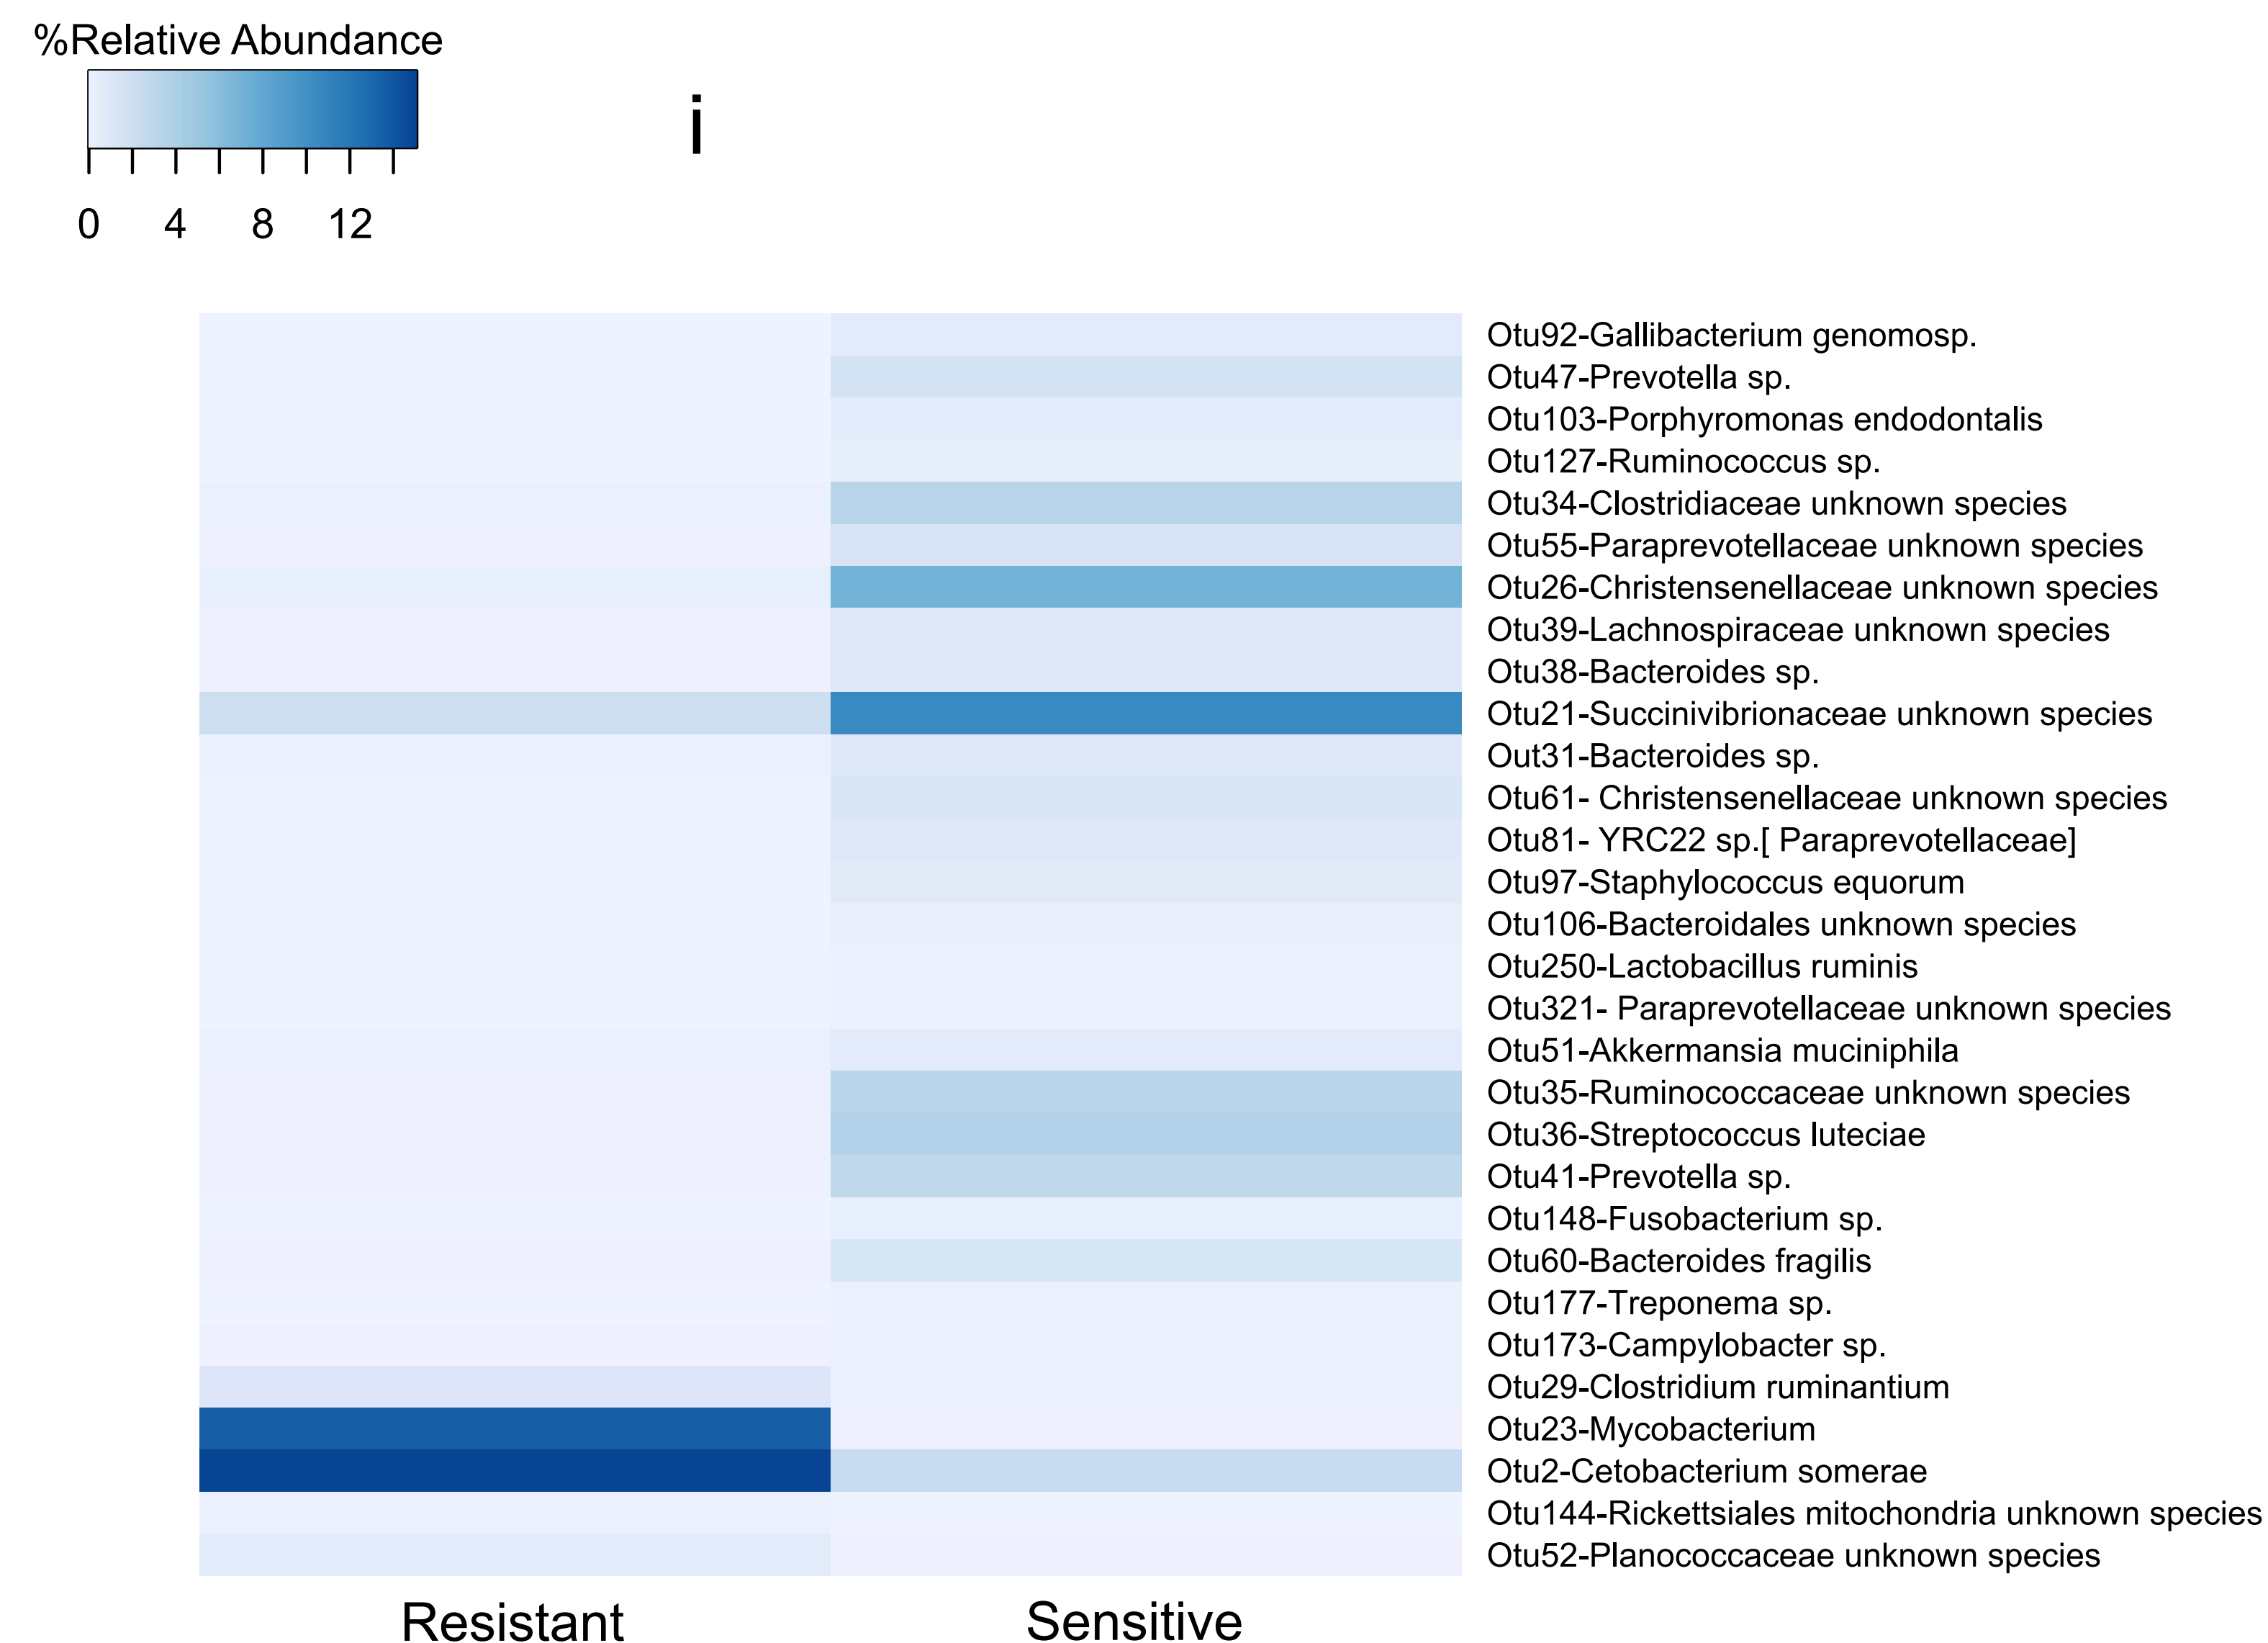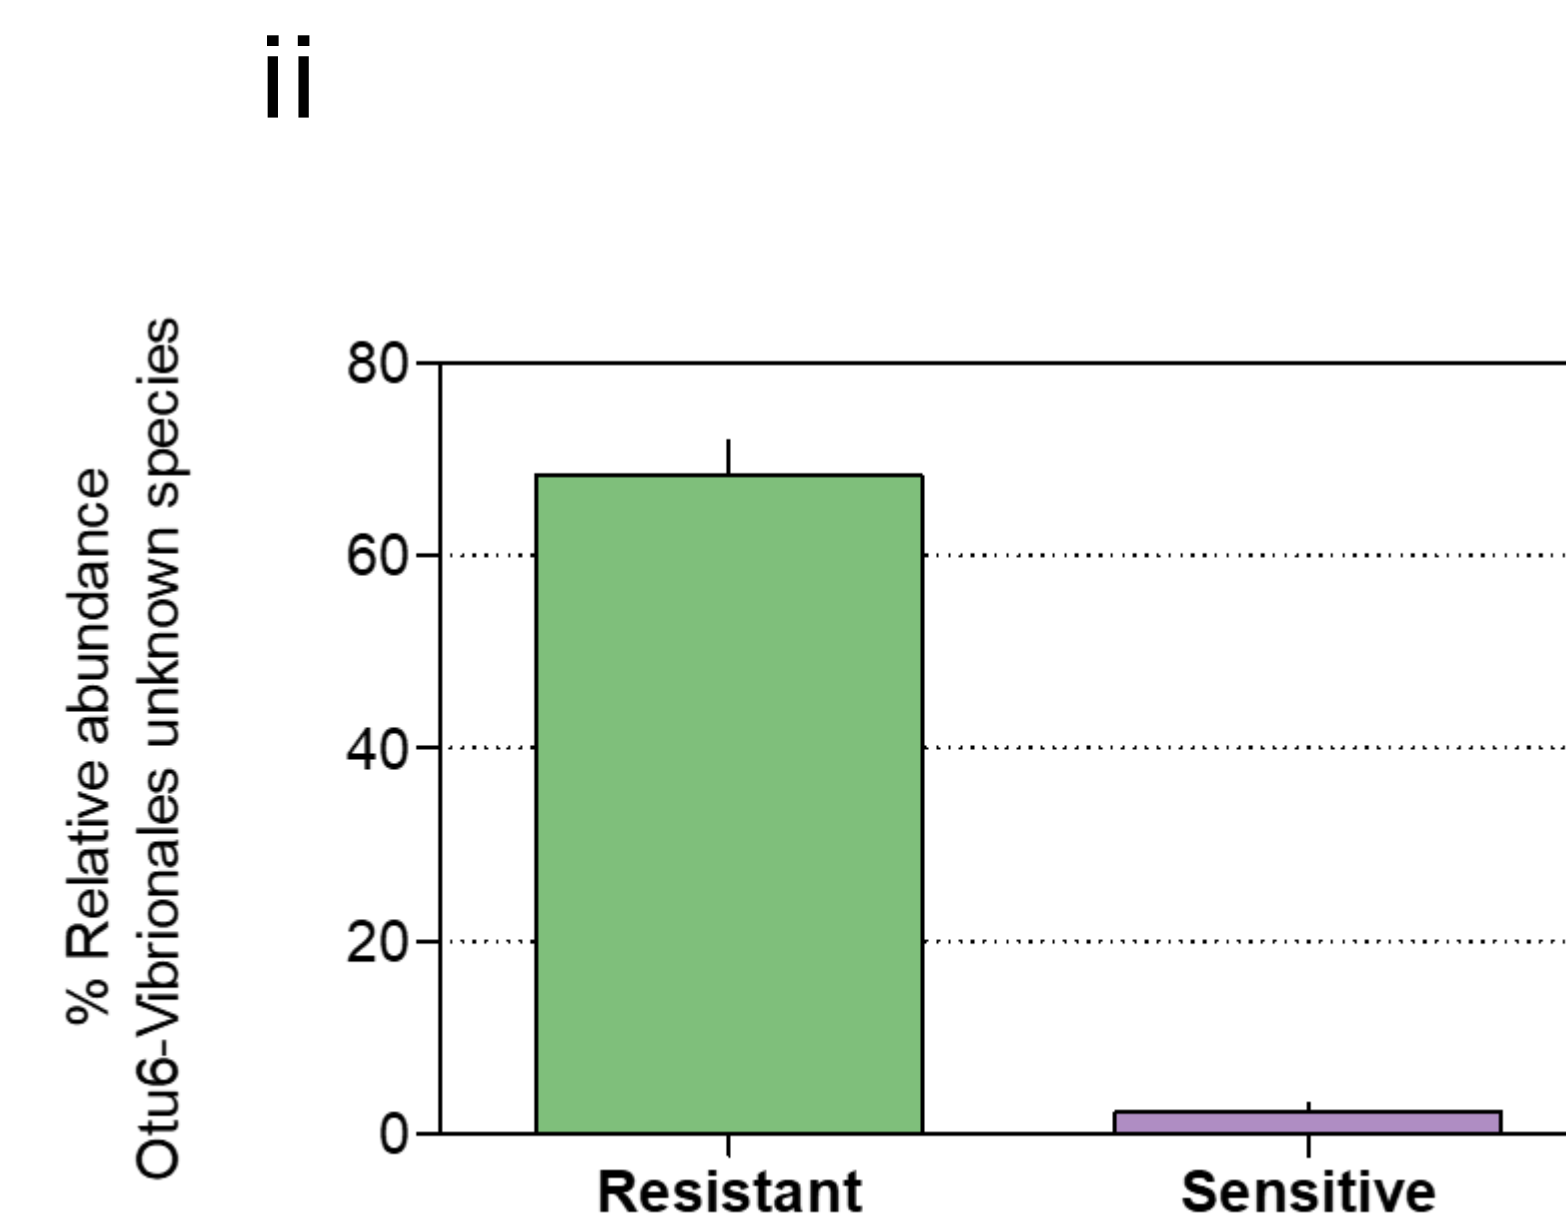

**Figure 2 – figure supplement 7.** Relative abundance of host-related (indicator) species that were significantly enriched in low and high diversity microbiomes (see Supplementary Table S5 for P-values), in (i) warm and (ii) cold conditions in resistant and sensitive fish hosts.
