# Supplementary material for: Host genetic selection for cold tolerance shapes microbiome composition and modulates its response to temperature
Source: eLife journal article supplement (doi:10.7554/elife.36398), 2018-11-19
Supplement: supp [file elife-36398-supp-v1.zip › elife_poa_e36398_Figure_2_figure_supplement_8.pdf]

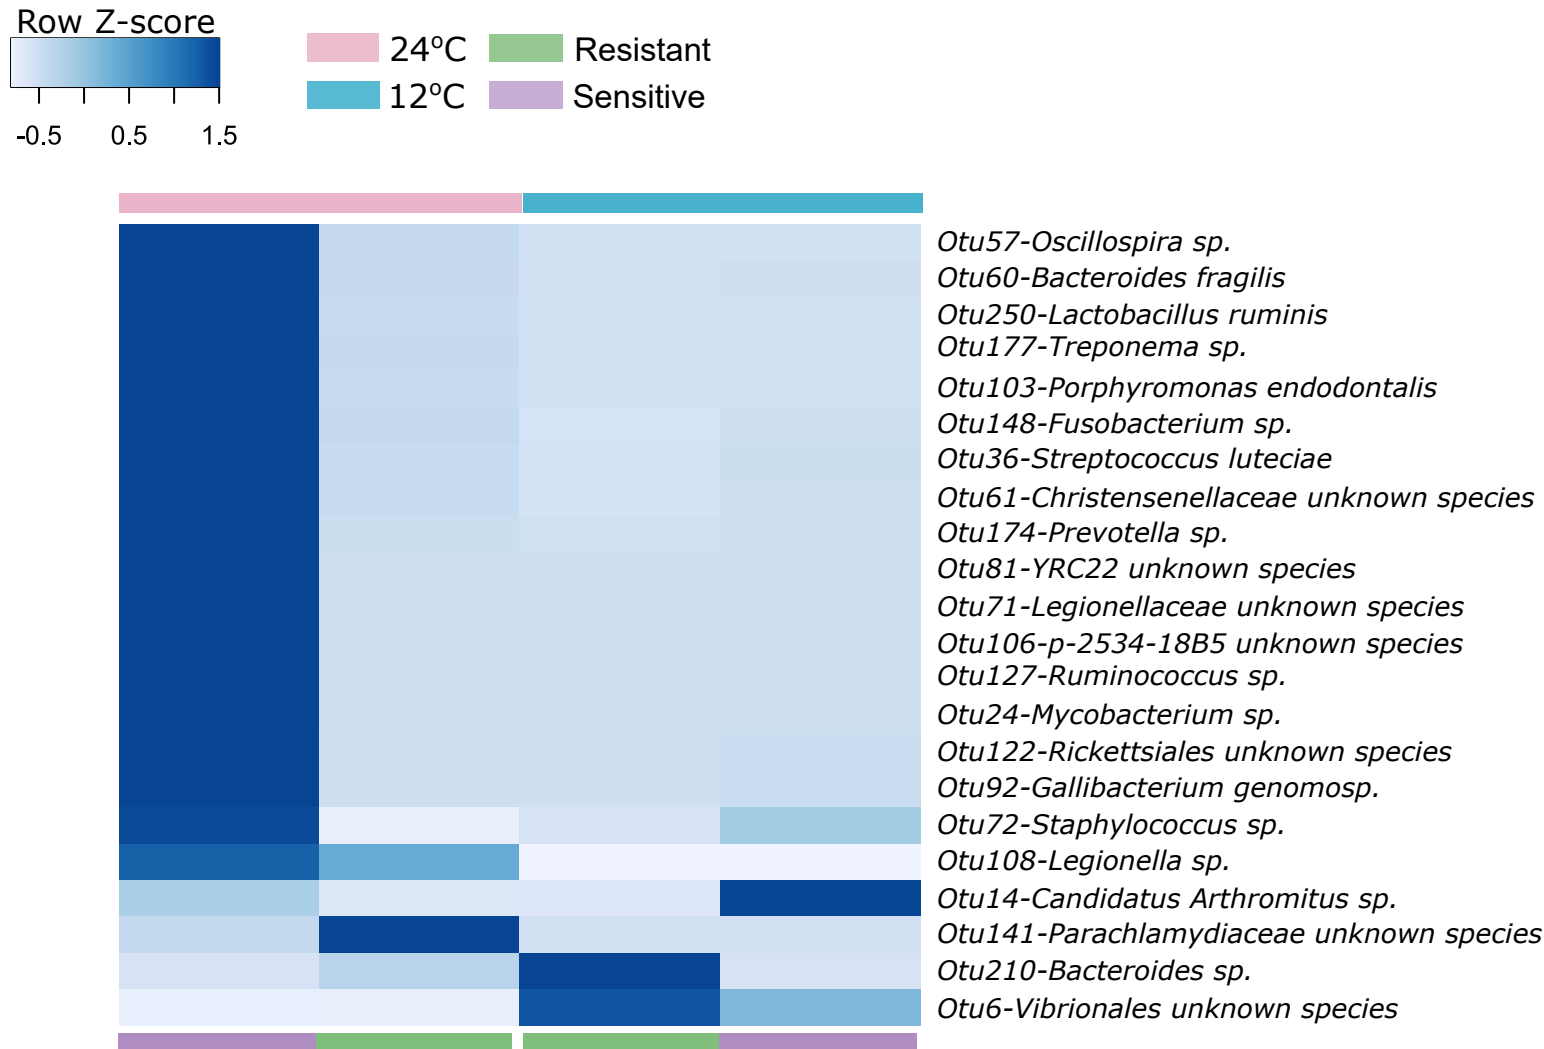

**Figure 2 – figure supplement 8.** Indicator species analysis (see Methods section) revealed several exact sequence variants that were specific to either the resistant or sensitive fish posterior gut. As previously shown, sensitive animals had a higher number of specific orders compared to the resistant ones.
