# Supplementary material for: Host genetic selection for cold tolerance shapes microbiome composition and modulates its response to temperature
Source: eLife journal article supplement (doi:10.7554/elife.36398), 2018-11-19
Supplement: supp [file elife-36398-supp-v1.zip › elife_poa_e36398_Figure_3_figure_supplement_1.pdf]

i

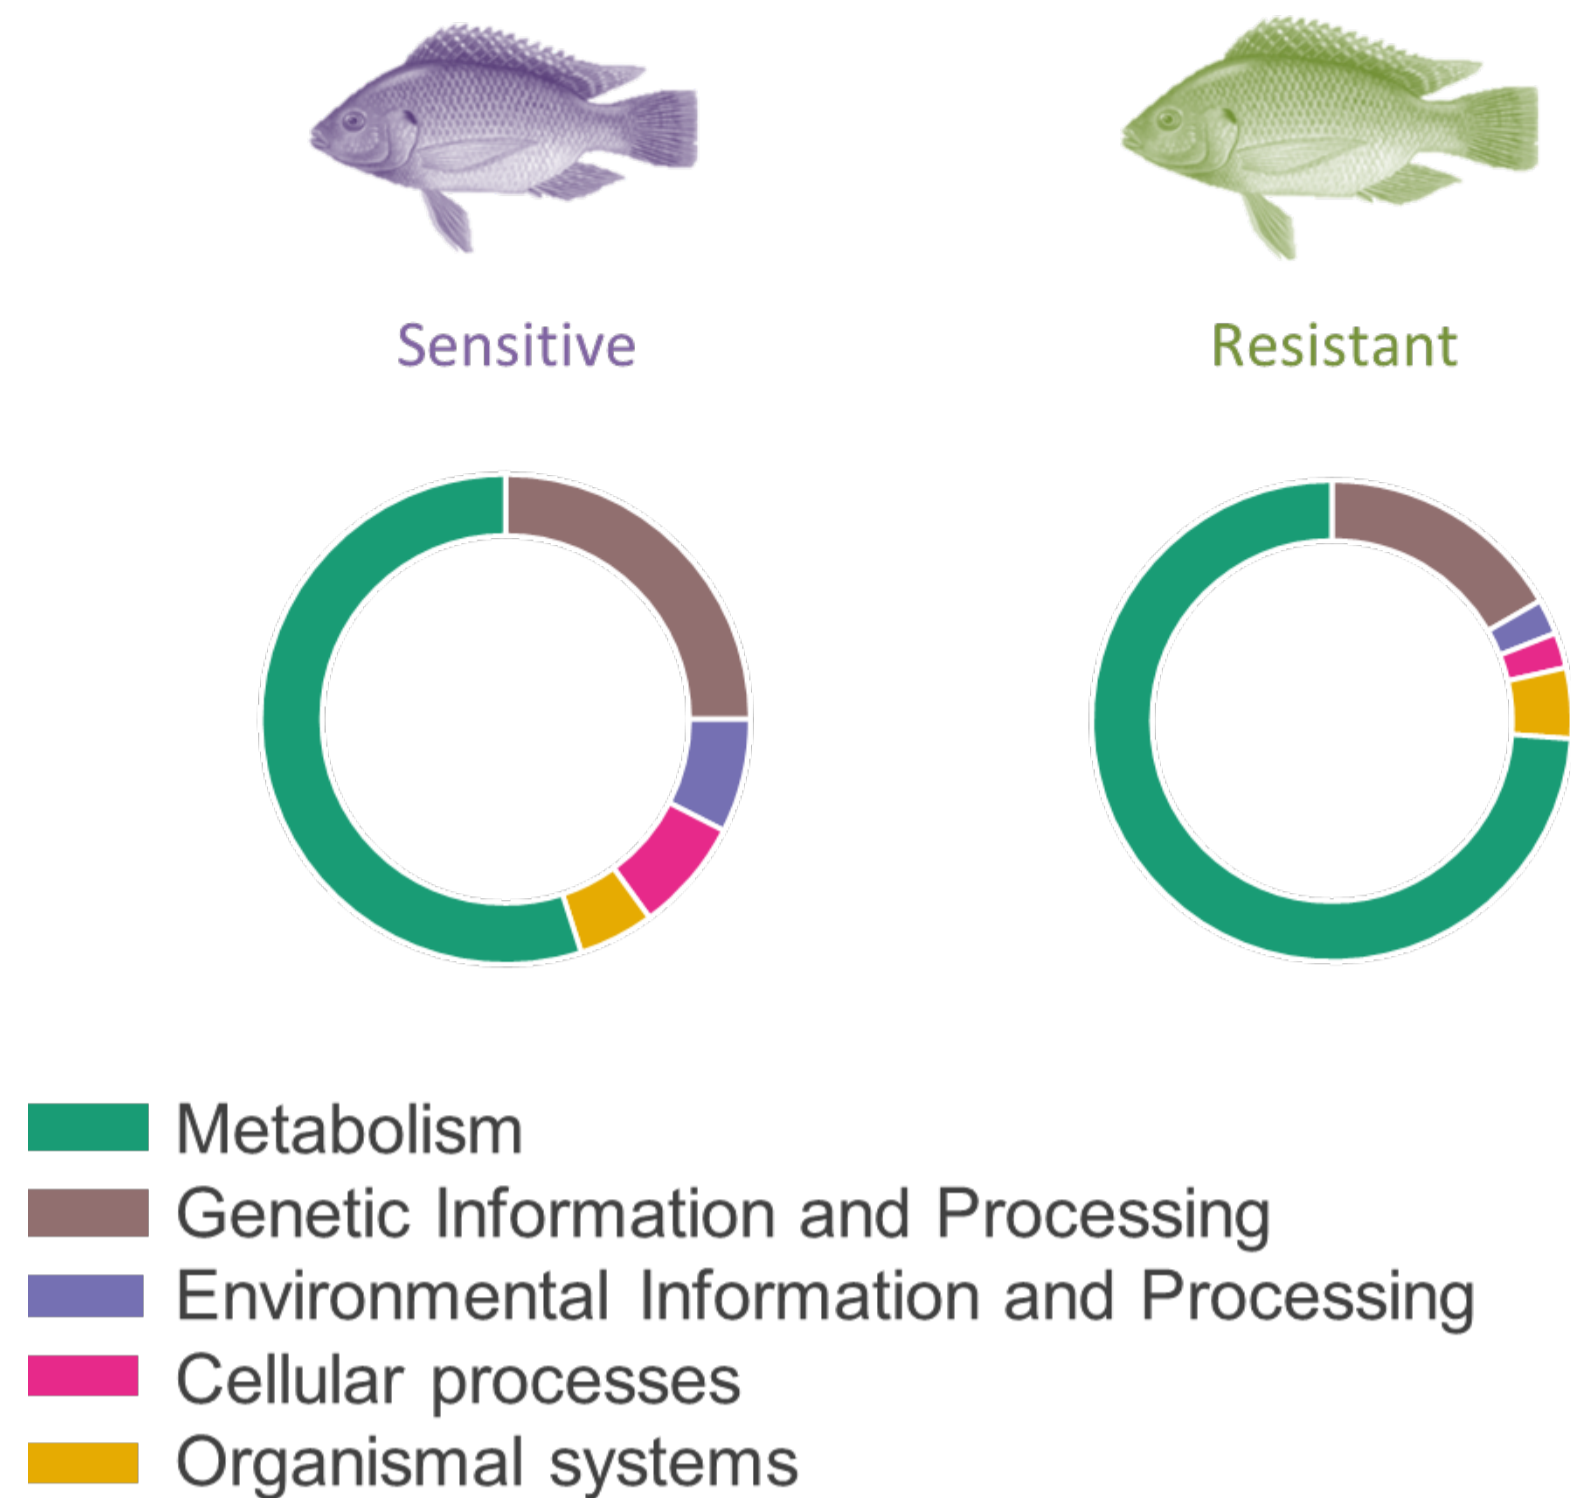

ii

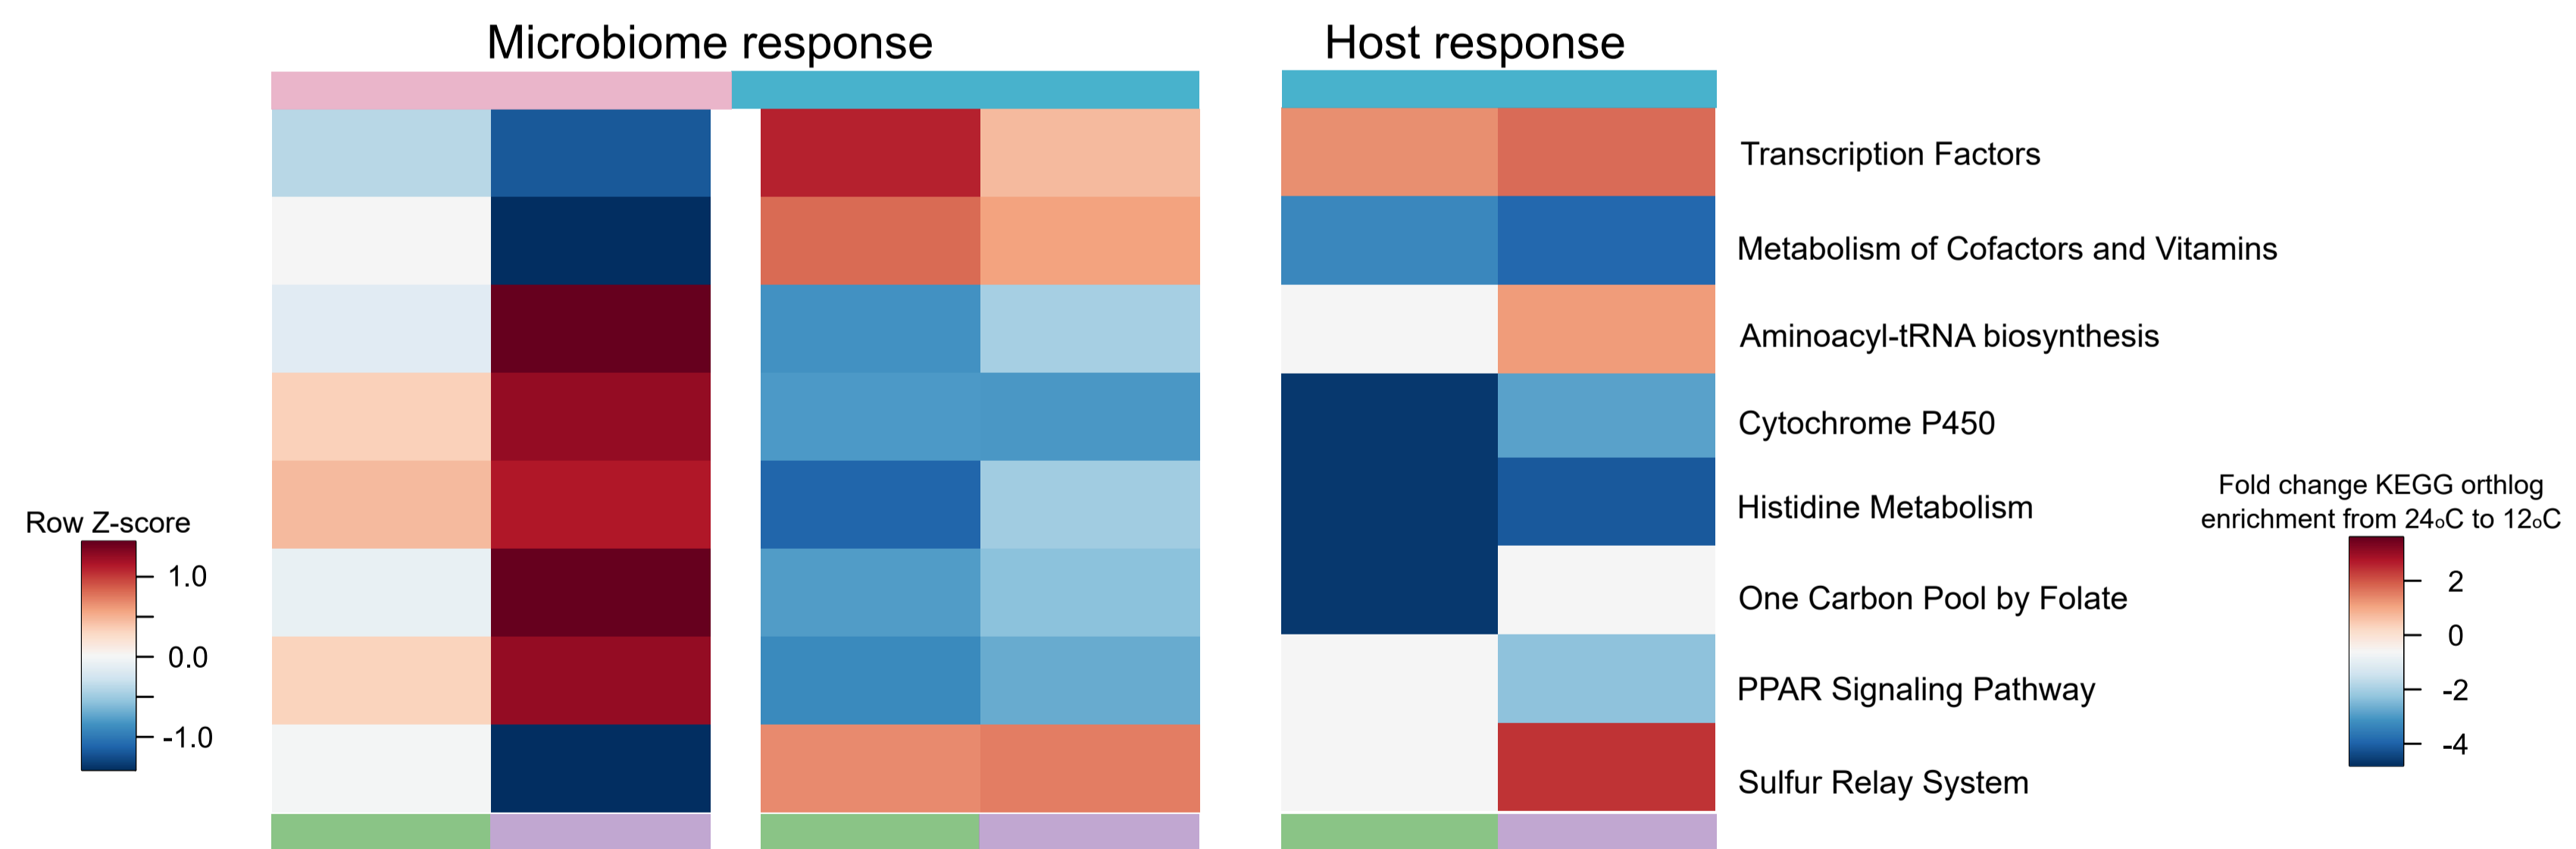

**Figure 3 – figure supplement 1. (i)** Pathways affected during cold exposure in the resistant and sensitive fish families, assigned to KEGG categories, as indicated by transcriptomic analysis. The size of the fraction is relative to the total number of pathways affected for each KEGG category. **(ii)** Common KEGG pathways identified to be affected (red: upregulated; blue: downregulated) by the cold exposure shared between the microbiome and the host transcriptomic response in the liver.
