# Supplementary material for: Host genetic selection for cold tolerance shapes microbiome composition and modulates its response to temperature
Source: eLife journal article supplement (doi:10.7554/elife.36398), 2018-11-19
Supplement: supp [file elife-36398-supp-v1.zip › elife_poa_e36398_Figure_4_figure_supplement_2.pdf]

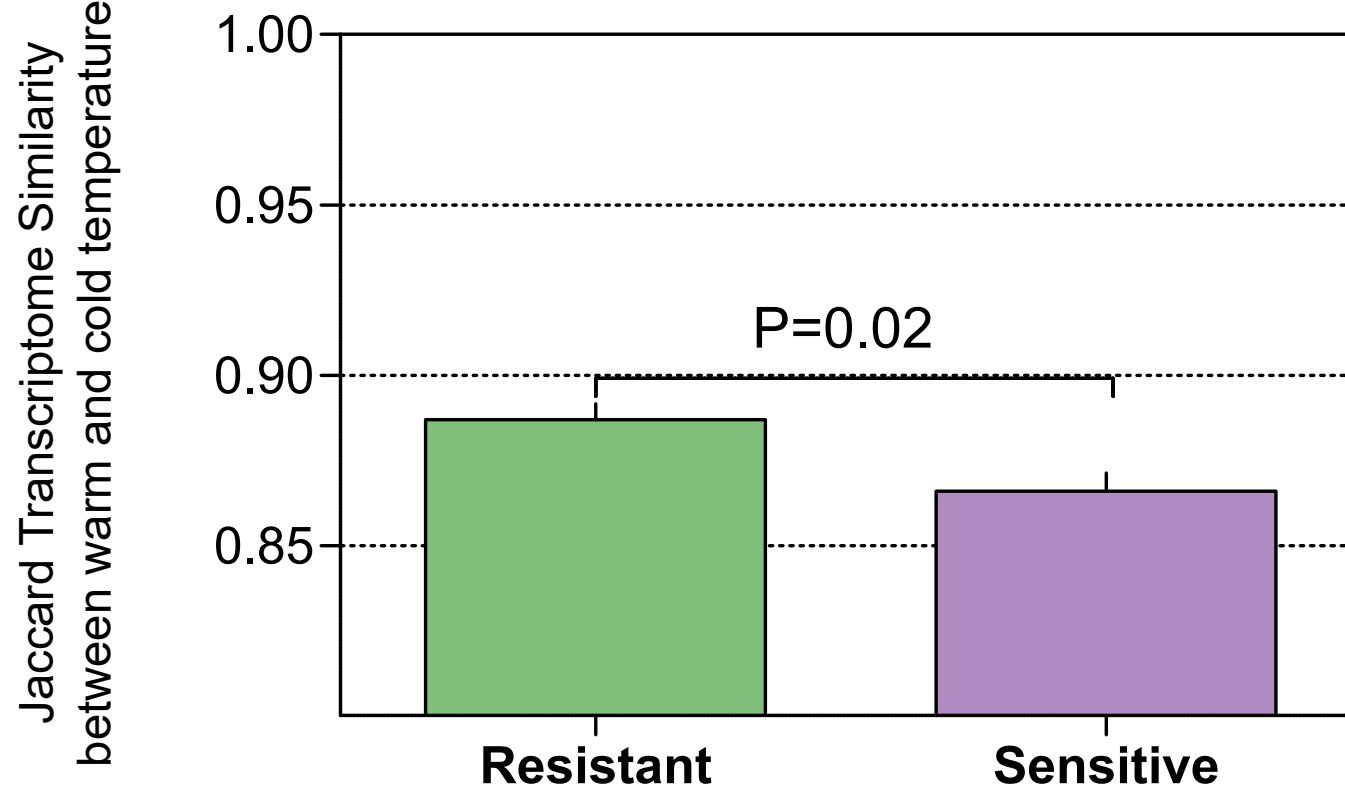

**Figure 4 – figure supplement 2.** Comparison of the host-associated gene (indval analysis) expression similarity (Jaccard) within each of the host groups between warm and cold conditions showed a higher similarity among the resistant individuals compared to the sensitive ones (Wilcoxon rank-run test,  $P=0.02$ , one-sided).
